# Supplementary material for: Bacterial Communities of the Coronal Sulcus and Distal Urethra of Adolescent Males
Source: PLoS One. 2012 May 11;7(5):e36298. doi: 10.1371/journal.pone.0036298 (PMC3350528; doi:10.1371/journal.pone.0036298)
Supplement: Table S4 — RDP classifier summary of 16 S rRNA sequences and select meta-data. Tables list 90% confidence RDPII results for quality-checked sequences. V6–V9 data-set. (XLS) [file pone.0036298.s005.xls]

## Sheet: Sheet1
Key: YMP ID = Subject. Method = U (urine), S (coronal sulcus). Race = self reported race. Circumcised = Y (yes), N (no). Had vaginal, had anal, received oral; y = had ever reported activity at sampling point.
Enrollment
YMP_ID	1	2	3	4	5	6	7	8	9	10	11	12	13	14	15	16	17	18	1	2	3	4	5	6	7	8	9	10	11	12	13	14	15	16	17	18
Method	U	U	U	U	U	U	U	U	U	U	U	U	U	U	U	U	U	U	S	S	S	S	S	S	S	S	S	S	S	S	S	S	S	S	S	S
Race	White	White	Black	White	White	Black	Hispanic	Black	Peruvian/Puerto_Rican	White	Venezuelan	White	White	Black	Black	Black	Hispanic	Black	White	White	Black	White	White	Black	Hispanic	Black	Peruvian/Puerto_Rican	White	Venezuelan	White	White	Black	Black	Black	Hispanic	Black
Circumcised	No	Yes	Yes	Yes	No	Yes	Yes	Yes	Yes	Yes	Yes	Yes	No	Yes	No	No	No	Yes	No	Yes	Yes	Yes	No	Yes	Yes	Yes	Yes	Yes	Yes	Yes	No	Yes	No	No	No	Yes
HadVaginal	No	No	Yes	No	No	Yes	Yes	Yes	Yes	No	No	Yes	Yes	Yes	No	Yes	No	Yes	No	No	Yes	No	No	Yes	Yes	Yes	Yes	No	No	Yes	Yes	Yes	No	Yes	No	Yes
HadAnal	No	No	No	No	No	No	Yes	No	Yes	No	No	Yes	No	Yes	No	Yes	No	No	No	No	No	No	No	No	Yes	No	Yes	No	No	Yes	No	Yes	No	Yes	No	No
ReceivedOral	No	No	No	No	No	Yes	No	Yes	Yes	No	No	Yes	Yes	Yes	No	Yes	No	Yes	No	No	No	No	No	Yes	No	Yes	Yes	No	No	Yes	Yes	Yes	No	Yes	No	Yes
Total High-quality Seq	2454	2048	14763	6505	9194	2745	1850	7928	7910	9541	6784	7911	13471	10658	12916	2616	9875	3532	5340	6269	17266	6047	7622	6722	2355	19350	10741	4537	23123	10597	19676	9295	5795	8743	22414	3687
Acetivibrio	0	0	0	0	0	0	0	0	0	0	0	0	0	0	0	0	0	0	0	0	0	0	1	0	0	0	0	0	0	0	0	0	0	0	0	0
Acidovorax	0	0	0	0	0	0	0	0	0	0	0	30	0	0	2	0	0	0	0	0	0	1	0	0	0	0	0	0	0	0	0	0	0	0	0	0
Acinetobacter	1	1	0	0	1	5	0	0	2	0	11	7	0	0	10	0	2	0	0	2	12	11	0	0	0	0	0	0	10	9	5	6	2	6	0	2
Actinobacillus	0	0	0	0	0	0	0	0	0	0	0	0	0	0	3	0	0	0	0	0	0	0	0	0	0	0	0	0	0	0	0	0	0	0	0	0
Actinobaculum	0	0	0	0	1	0	0	0	0	0	8	0	0	0	0	0	139	0	8	0	0	0	0	0	0	0	0	0	0	0	1	0	0	0	231	0
Actinomyces	32	9	40	1	2	35	18	10	12	140	85	103	0	17	59	24	28	232	5	3	18	57	34	5	9	54	53	91	43	17	605	185	64	47	1	140
Aerococcus	0	0	0	0	0	0	2	0	0	0	0	0	296	0	0	0	0	18	0	0	1	0	0	0	1	0	1	0	0	0	0	0	0	0	0	0
Aeromonas	0	0	0	0	0	0	0	0	0	0	0	0	0	0	0	7	0	0	1	0	0	0	0	0	0	4	0	0	0	0	0	0	1	0	0	0
Aggregatibacter	0	0	0	0	0	0	0	0	0	0	0	0	0	0	0	0	0	4	0	0	0	0	0	0	0	0	0	0	0	0	0	0	0	0	0	0
Akkermansia	0	0	0	0	0	0	0	0	0	0	0	0	0	0	0	0	0	0	0	0	0	0	0	0	0	0	2	0	4	0	0	0	0	0	0	0
Alcaligenes	0	0	0	0	0	0	0	0	0	0	0	0	0	0	0	0	0	0	0	0	0	0	0	0	0	4	0	0	0	0	0	0	0	0	0	0
Alcanivorax	0	0	0	0	0	0	0	0	0	0	0	0	0	0	0	0	0	0	0	0	0	2	0	0	0	0	0	0	0	0	0	0	0	0	0	0
Anaerococcus	2	41	702	1	110	3	83	78	17	17	0	1	4	0	845	0	1	80	19	448	3100	5	382	1434	199	632	3454	3	490	11	5164	133	1346	226	2	637
Anaerosphaera	0	0	0	0	0	0	0	0	0	0	0	0	0	0	0	0	0	0	0	0	0	0	0	0	0	0	0	0	0	0	0	0	0	0	1	0
Anaerotruncus	0	0	0	0	0	0	0	0	0	0	0	0	0	0	0	0	0	3	0	0	0	0	0	0	0	0	0	0	0	0	0	0	0	0	0	0
Anoxybacillus	0	0	0	0	0	0	0	0	0	0	0	0	0	0	0	1	0	0	0	0	0	0	0	0	0	0	0	0	0	0	2	0	0	0	0	0
Aquabacterium	0	0	0	0	0	0	0	0	0	0	3	0	0	0	0	0	0	0	0	0	0	0	0	0	0	0	0	0	0	0	0	0	0	0	0	0
Aquicella	0	0	0	0	0	0	0	0	0	0	0	0	0	0	0	0	0	0	0	1	0	0	0	0	0	0	0	0	0	0	0	0	0	0	0	0
Arcanobacterium	0	0	0	0	0	0	0	0	0	0	0	0	0	0	0	0	3	0	0	0	0	0	0	0	0	0	0	0	0	0	0	0	0	0	0	0
Arthrobacter	1	0	0	0	0	2	0	0	0	0	3	0	0	0	0	4	0	4	0	0	0	0	0	0	0	0	0	0	0	0	0	0	1	5	0	0
Atopobium	6	0	0	0	0	0	0	0	224	0	0	0	0	0	0	0	0	0	23	0	0	0	0	0	0	0	2	0	0	1	0	0	0	0	0	2
Atopostipes	0	0	0	0	0	0	0	0	0	0	0	0	0	0	0	0	0	0	0	0	0	0	0	0	0	0	1	0	0	0	0	0	0	0	0	0
Aurantimonas	0	0	0	0	0	0	0	0	0	0	0	0	0	0	0	0	0	0	0	0	0	0	0	0	0	0	0	1	0	0	0	0	0	7	0	0
Azospirillum	0	0	0	0	0	1	0	0	0	0	0	0	0	0	0	0	0	0	0	0	0	0	0	0	0	0	0	0	0	0	0	0	0	0	0	0
Bacillariophyta	0	0	0	0	0	0	0	0	0	0	0	0	0	0	0	0	2	0	0	0	0	0	0	0	0	0	0	0	0	0	0	0	0	0	0	0
Bacillus	0	0	0	0	0	0	0	1	0	0	0	0	0	0	0	0	0	0	0	0	0	0	0	0	0	0	0	0	0	4	0	0	0	0	0	0
Bacteriovorax	0	1	0	0	0	0	0	0	0	0	0	0	0	0	0	0	0	0	0	0	0	0	0	0	0	0	0	0	0	0	0	0	0	0	0	0
Bacteroides	1	0	14	0	0	1	9	0	2	9	6	5	0	2	7	9	1	0	0	2	1	14	0	0	0	12	7	1	12	13	0	3	1	10	0	0
Balneimonas	0	0	0	0	0	0	0	0	0	0	0	0	0	0	0	0	0	0	0	0	0	0	0	0	0	0	1	0	0	0	0	0	0	0	0	0
Bdellovibrio	0	0	0	0	0	0	0	0	0	0	0	0	0	0	0	0	0	0	0	0	0	0	0	0	0	0	0	0	0	2	0	0	0	0	0	0
Bifidobacterium	0	2	6	0	0	0	1	0	0	0	4	12	0	1	22	3	6	4	1	0	6	8	0	3	2	2	3	16	0	8	2	15	9	0	2	0
Blastococcus	1	0	0	0	0	0	0	0	0	0	0	0	0	0	0	0	0	0	0	0	0	0	0	0	0	0	0	0	0	0	0	0	0	0	0	0
Blautia	0	0	0	0	0	0	6	0	0	0	0	1	0	0	0	0	0	7	0	0	0	0	0	0	2	4	0	5	0	0	0	0	6	0	0	0
Bordetella	0	0	0	0	0	0	0	0	0	0	0	0	0	0	0	2	0	0	0	0	0	0	0	0	0	0	0	0	0	0	0	0	0	0	0	0
Bosea	0	0	0	0	0	0	0	0	0	0	0	0	0	0	0	0	0	0	1	0	0	0	0	0	0	4	0	0	0	0	0	0	0	0	0	0
Brachybacterium	0	0	0	0	0	0	1	0	0	0	0	7	0	0	0	0	0	0	0	3	1	0	0	0	0	6	0	0	0	0	0	0	0	2	0	2
Brevibacillus	0	0	0	0	0	0	0	0	0	0	0	0	0	0	0	0	0	0	0	0	0	0	0	1	0	0	0	0	0	0	0	0	0	0	0	0
Brevibacterium	0	0	0	0	0	0	0	0	0	0	0	0	0	0	43	0	0	3	0	0	2	0	1	0	0	11	0	13	0	3	0	0	17	112	0	27
Brevundimonas	0	0	0	0	0	0	0	0	0	0	2	50	0	0	0	0	1	0	0	0	0	0	0	0	0	0	3	0	3	0	0	0	0	1	0	0
Brochothrix	0	0	0	0	0	0	0	0	0	0	0	0	0	0	0	0	0	0	0	0	0	0	0	0	0	0	0	0	0	0	0	0	0	9	0	0
Burkholderia	0	0	0	1	0	2	1	0	1	0	5	2	0	0	5	0	1	0	0	0	0	0	0	0	0	3	0	0	0	0	0	9	0	0	0	0
Caedibacter	0	0	0	0	0	0	0	0	0	0	0	0	0	0	0	0	0	0	0	0	1	0	0	0	0	0	0	0	0	0	0	0	0	0	0	0
Campylobacter	111	0	15	0	0	0	0	0	0	0	0	10	0	0	5	0	339	0	665	0	0	0	67	0	0	3	0	0	1	1	0	0	0	0	1236	0
Capnocytophaga	0	0	7	0	0	0	0	5	0	6	0	0	0	0	0	0	0	0	0	0	0	16	0	0	0	0	0	7	0	0	0	0	4	0	0	0
Cardiobacterium	0	0	0	0	0	6	0	6	0	0	0	0	0	0	0	0	0	0	0	0	0	0	0	0	0	0	0	0	8	0	0	0	0	0	0	0
Catonella	0	0	0	0	0	0	0	0	0	0	0	0	0	0	0	0	0	0	0	0	0	0	0	0	0	4	0	0	0	0	0	0	0	0	0	0
Caulobacter	0	0	0	0	0	0	0	0	0	0	0	0	0	2	0	0	0	0	0	0	0	0	0	0	0	0	0	0	0	0	0	0	0	0	0	0
Centipeda	0	0	0	0	0	0	0	0	0	0	0	0	0	0	0	0	0	5	0	0	0	0	0	0	0	0	0	0	0	0	0	0	0	0	0	0
Chlorophyta	0	0	0	0	0	2	0	0	0	0	3	0	0	0	1	0	0	0	0	0	0	0	0	0	0	6	0	0	0	0	0	0	0	0	0	0
Citrobacter	1	2	1	0	0	0	0	0	0	0	0	0	0	0	0	36	0	1	0	0	1	0	0	1	0	5	2	3	6	15	4	0	0	6	0	0
Clostridium	0	0	0	0	0	0	0	0	0	0	0	6	0	0	17	0	0	0	0	0	0	0	0	0	1	0	0	0	0	0	0	0	4	0	0	0
Collinsella	0	0	0	0	0	0	0	0	0	0	0	0	0	0	0	0	0	0	0	0	0	0	0	0	0	0	0	0	0	0	3	0	0	0	0	0
Conexibacter	0	1	0	0	0	0	0	0	0	0	0	0	0	0	0	0	0	0	0	0	0	0	0	0	0	0	0	0	0	0	0	0	0	0	0	0
Coprococcus	0	0	0	0	0	0	0	0	0	0	0	0	0	0	0	0	0	0	0	0	1	0	0	0	0	0	0	4	0	0	0	0	0	0	0	0
Corynebacterium	3	721	1296	5	64	516	78	658	37	18	161	53	3	19	1740	94	73	762	102	3846	7011	76	48	2802	497	5871	3616	165	15710	809	7253	2904	1216	3787	2	1225
Cupriavidus	0	0	0	0	0	0	0	0	0	0	0	0	0	0	0	0	0	0	0	0	0	0	0	0	0	0	0	0	0	0	1	0	0	0	0	0
Curvibacter	0	0	0	0	0	0	0	0	0	0	0	0	0	0	0	0	0	0	0	0	0	0	0	0	0	0	0	0	0	0	0	2	0	0	0	0
Dechloromonas	0	0	0	0	0	0	0	0	0	0	0	0	0	1	0	0	0	0	0	0	0	0	0	0	0	0	0	0	0	0	0	0	3	0	0	0
Deinococcus	0	0	3	0	1	0	0	0	0	4	0	14	0	0	1	0	3	0	0	0	0	0	0	0	0	0	0	5	0	3	14	0	0	0	0	0
Dermabacter	0	6	0	0	0	0	0	12	0	0	0	0	0	0	5	0	2	3	0	57	33	5	0	32	0	426	14	0	71	0	12	1	1	19	0	70
Dialister	37	0	0	0	0	0	0	0	1	0	7	0	0	0	0	0	17	0	481	0	5	0	887	0	0	0	4	0	0	0	0	0	0	25	234	0
Diaphorobacter	0	0	0	0	0	0	0	0	0	0	6	0	0	2	5	0	0	0	0	0	0	12	0	0	2	0	0	0	2	0	0	0	2	3	0	0
Dolosigranulum	0	0	0	0	0	0	0	0	2	6	0	0	0	0	0	0	0	0	0	0	0	0	0	0	0	0	0	2	0	0	0	0	0	0	0	0
Dorea	0	3	0	0	0	0	0	0	0	0	0	0	0	0	0	0	0	0	0	0	0	0	0	0	0	7	0	0	0	0	0	0	2	0	0	0
Enhydrobacter	0	0	0	0	0	0	0	0	0	0	0	3	0	0	0	0	0	0	1	0	0	0	0	0	0	0	0	0	4	0	0	0	0	6	0	0
Enterobacter	0	0	0	0	0	0	0	0	0	0	0	0	0	0	0	0	0	0	0	0	0	0	0	0	0	0	0	0	1	0	0	0	0	0	0	0
Enterococcus	0	0	0	0	2	0	0	0	1	0	0	0	0	0	0	0	473	0	0	0	0	0	3	0	0	0	0	0	0	0	0	0	0	0	22	0
Eremococcus	0	0	0	0	0	0	0	0	0	0	0	0	0	0	0	0	0	0	1	1	0	0	1	0	0	0	0	0	1	0	0	0	0	0	0	8
Escherichia/Shigella	411	9	51	0	0	8	9	12	6	32	33	100	0	23	47	22	12	11	0	3	13	72	0	3	4	36	8	42	22	7	25	53	1	17	0	4
Ethanoligenens	0	0	0	0	0	0	0	0	0	0	0	0	0	0	0	0	0	0	1	0	0	0	0	0	0	0	0	0	0	0	0	0	0	0	0	0
Eubacterium	0	0	0	0	0	0	0	0	0	0	0	0	0	0	0	0	0	0	1	0	0	0	0	0	0	0	0	0	10	0	0	3	0	5	0	0
Exiguobacterium	0	0	0	0	1	0	0	0	0	0	0	0	0	0	0	0	0	0	0	0	0	0	3	0	0	0	0	0	0	0	0	0	0	0	0	0
Facklamia	0	0	32	1	0	0	9	0	0	0	0	0	0	0	38	0	0	40	0	0	9	0	6	0	17	0	0	0	81	0	2	0	15	8	0	54
Faecalibacterium	3	0	1	0	0	0	3	0	4	9	11	7	0	1	7	5	2	1	0	0	0	0	0	0	0	0	0	0	4	3	17	0	0	0	0	1
Fastidiosipila	2	0	0	0	0	0	0	0	0	0	0	0	0	0	30	0	0	0	13	0	0	0	0	0	2	0	0	0	0	0	0	0	40	0	0	8
Filifactor	0	0	0	0	0	0	0	0	0	0	0	0	0	0	0	0	0	0	0	0	0	0	0	1	0	0	0	0	0	0	0	0	0	0	0	0
Finegoldia	0	13	70	0	35	0	40	6	0	11	0	0	0	0	116	7	4	20	10	44	163	0	88	313	123	221	217	0	0	5	580	7	377	86	0	106
Flavisolibacter	1	0	0	0	0	0	0	0	0	0	0	0	0	0	0	0	0	0	0	0	0	0	0	0	0	0	0	0	0	0	0	0	0	0	0	0
Friedmanniella	0	0	0	0	0	0	0	0	0	0	0	0	0	0	0	0	0	0	0	0	3	0	0	0	0	0	0	0	0	0	0	0	0	0	0	0
Fusobacterium	5	0	20	2	1	7	2	4	5	16	9	2	0	2	4	10	6	1	0	0	0	3	0	0	0	8	1	0	5	14	1	6	0	9	2	0
Gardnerella	0	0	1	721	113	0	0	5173	52	0	1	0	207	0	1	0	1	0	0	0	1	0	2	0	0	3	0	0	0	0	2	1	0	1	2	0
Gemella	40	40	401	16	5	130	62	56	69	417	304	242	2	42	367	118	57	138	13	20	61	444	3	19	19	270	64	288	197	193	160	370	17	162	1	14
Gemmatimonas	0	0	0	0	0	0	0	0	0	0	0	0	0	0	4	0	0	0	0	0	0	0	0	0	0	0	0	0	0	0	0	0	0	0	0	0
Gordonia	0	0	0	0	0	0	2	0	0	0	0	0	0	0	0	0	0	0	0	0	0	0	0	0	0	0	0	0	0	0	0	0	0	0	0	0
Gp4	0	0	0	0	0	0	0	0	0	0	0	0	0	1	0	0	0	0	0	0	0	0	0	0	0	0	0	0	0	0	0	0	0	0	0	0
Gp6	0	0	0	0	0	0	0	0	0	0	0	0	0	0	0	6	0	0	0	0	0	0	0	0	0	0	0	0	0	0	0	0	0	0	0	0
Granulicatella	1	0	76	0	0	1	0	0	1	0	3	0	0	0	14	0	1	0	0	0	0	11	0	1	0	0	2	5	10	12	0	7	0	5	0	0
Haemophilus	0	0	0	0	0	0	0	0	0	1	0	0	0	0	0	0	0	0	0	0	0	0	0	0	0	0	0	0	0	0	0	0	0	0	0	0
Hallella	0	0	0	0	0	0	0	0	0	0	0	0	0	0	0	0	0	0	0	0	0	0	1	0	0	0	0	0	0	0	0	0	0	0	1	0
Halomonas	0	0	0	0	0	0	0	0	0	0	0	1	0	0	0	0	0	0	0	0	0	0	0	0	0	0	0	0	0	0	0	0	0	0	0	0
Helcococcus	0	0	0	0	0	0	0	0	0	0	0	0	0	0	0	0	38	0	0	0	0	0	0	0	0	0	0	0	4	0	0	0	0	0	36	0
Herbaspirillum	2	0	0	0	0	0	0	0	0	0	0	0	0	0	0	0	0	0	0	0	0	0	0	0	0	0	0	0	0	0	0	0	0	0	0	0
Howardella	0	0	0	0	0	0	0	0	0	0	0	0	0	0	0	0	4	0	0	0	0	0	8	0	0	0	0	0	0	0	0	0	0	0	8	0
Hydrogenophaga	0	0	0	0	0	0	0	0	0	0	0	0	0	0	0	0	0	0	0	0	0	0	0	0	0	0	0	0	0	0	0	3	0	0	0	0
Hyphomicrobium	0	0	0	0	0	0	0	0	0	3	0	0	0	0	0	0	0	0	0	0	0	0	0	0	0	0	0	0	0	0	0	0	0	0	0	0
Iamia	0	0	0	0	0	0	0	0	0	0	0	0	0	0	1	0	0	0	0	0	0	0	0	0	0	0	0	0	0	0	0	0	0	0	0	0
Janibacter	0	2	0	0	0	0	0	0	0	0	0	2	0	0	0	0	0	0	0	0	2	0	0	0	0	0	6	0	0	0	0	0	0	0	0	0
Janthinobacterium	1	0	0	0	0	0	0	0	0	0	0	0	0	0	0	0	0	0	0	0	0	0	0	0	0	1	0	0	0	0	0	1	0	0	0	0
Jeotgalicoccus	0	2	6	0	0	0	39	0	0	0	0	4	0	0	0	0	0	0	0	0	14	0	0	0	226	0	2	0	0	0	0	0	0	0	0	0
Kingella	0	0	8	0	0	0	1	0	0	0	8	0	0	0	7	0	0	0	0	0	0	0	0	0	0	0	0	0	1	0	0	5	4	2	0	0
Knoellia	0	1	0	0	0	0	0	0	0	0	0	0	0	0	0	0	0	0	0	0	0	0	0	0	0	0	0	0	0	0	0	0	0	1	0	0
Kocuria	0	0	0	0	0	0	0	0	0	0	0	0	0	0	0	0	0	0	0	0	4	0	0	0	0	0	0	0	0	0	2	0	0	0	0	0
Lactobacillus	1	3	1	3209	4923	4	0	0	2	2563	0	0	3512	2	1	0	0	0	0	0	1	0	5	0	0	1	20	0	1	0	3	0	0	0	1	1
Lactococcus	0	0	0	0	0	0	0	0	0	0	0	0	0	0	0	2	0	0	0	0	0	0	0	1	0	0	0	0	0	0	0	0	0	0	0	0
Legionella	0	0	0	1	0	0	0	0	0	0	0	0	0	0	0	0	0	0	0	0	0	0	0	0	0	0	0	0	0	0	0	0	0	0	0	0
Leptotrichia	0	0	0	0	0	0	0	1	0	0	0	0	0	0	0	0	0	0	0	0	0	0	0	0	0	0	6	0	0	0	0	0	0	0	0	3
Lysobacter	0	0	0	0	0	0	0	0	0	0	0	0	0	0	0	0	0	0	0	0	0	7	0	0	0	0	0	0	0	0	0	0	0	0	0	0
Mannheimia	2	1	6	1	0	3	1	1	3	6	10	7	0	1	2	3	1	2	0	0	3	10	0	1	0	2	2	6	2	4	0	15	1	4	0	0
Marinomonas	28	0	0	0	0	0	0	0	0	0	0	0	0	0	0	0	0	0	0	0	0	0	0	0	0	0	0	0	0	0	0	0	0	0	0	0
Marmoricola	0	0	0	0	0	0	0	0	0	0	0	0	0	0	0	0	0	0	0	0	0	0	0	0	0	0	0	0	4	0	0	0	0	0	0	0
Massilia	0	0	0	0	0	0	0	0	0	0	0	0	0	0	0	0	0	0	0	0	0	0	0	4	0	0	0	0	0	0	0	0	0	0	0	0
Megasphaera	0	0	0	0	0	0	0	0	0	0	0	0	0	0	0	0	0	0	0	0	0	0	0	0	0	0	5	0	0	0	0	0	0	0	0	0
Methylobacterium	0	0	2	0	0	2	4	1	0	2	2	3	0	0	13	2	0	0	0	1	0	0	0	0	0	4	4	0	0	0	0	0	0	0	0	0
Microbacterium	0	0	4	0	0	0	0	0	0	0	0	3	0	0	0	0	0	0	0	0	0	5	0	0	0	3	0	0	0	0	0	3	0	0	0	0
Micrococcus	0	0	0	2	0	0	13	0	8	0	0	0	0	1	0	0	0	0	0	0	1	0	0	2	50	0	24	0	6	0	4	8	0	19	0	0
Microlunatus	0	0	0	0	0	0	0	0	0	0	0	6	0	0	0	0	0	0	0	0	0	0	0	0	0	0	0	0	0	0	0	0	0	0	0	0
Mitsuokella	0	0	0	0	0	0	0	0	0	0	0	0	0	0	0	0	0	0	0	0	0	0	0	0	0	0	0	0	0	5	2	0	0	0	0	0
Mobiluncus	34	0	0	0	0	0	0	0	1	0	0	0	0	0	0	1	982	0	184	0	0	0	9	0	0	0	0	0	1	0	0	0	0	1	442	0
Modestobacter	0	0	0	0	0	0	0	0	0	0	0	0	0	0	0	0	0	0	0	0	0	0	0	0	0	0	0	0	5	0	0	0	0	0	0	0
Mogibacterium	0	0	0	0	0	0	0	0	0	0	0	0	0	0	0	0	0	0	0	0	2	0	1	0	0	0	0	0	0	0	0	0	0	0	0	0
Moraxella	0	0	0	0	0	0	0	0	0	0	0	0	0	0	0	0	0	0	0	0	0	0	0	0	0	2	0	0	0	0	0	0	0	0	0	0
Moryella	0	0	0	0	0	0	0	0	0	0	0	0	0	0	0	0	0	0	0	0	0	0	35	0	0	0	0	0	0	0	0	0	0	0	0	0
Mucilaginibacter	0	0	0	0	0	0	0	0	0	0	0	0	0	1	0	0	0	0	0	0	0	0	0	0	0	0	0	0	0	0	0	0	0	0	0	0
Neisseria	1	2	0	0	0	0	0	0	5	20	21	0	0	0	1	0	4	0	0	1	3	7	0	6	0	10	4	3	16	7	0	3	0	2	0	0
Nesterenkonia	0	0	0	0	0	0	0	0	0	0	0	4	0	0	3	0	0	0	0	0	0	0	0	0	0	0	0	0	0	0	0	1	0	0	0	0
Nocardioides	0	0	0	0	0	0	0	0	0	0	0	0	0	0	0	0	0	0	0	0	0	0	0	0	1	0	0	0	0	0	0	0	0	0	0	0
Nosocomiicoccus	0	0	0	0	0	0	0	0	0	0	0	0	0	0	9	0	0	0	0	1	0	0	0	0	10	0	0	0	0	0	0	0	0	0	0	0
Novosphingobium	0	0	0	0	0	0	0	0	0	0	0	0	0	0	0	0	0	0	0	0	0	0	0	0	0	0	2	0	0	0	0	0	0	0	0	0
Ochrobactrum	0	0	0	0	0	0	0	0	0	0	0	0	0	0	0	0	0	0	0	0	0	0	0	0	0	1	0	0	0	0	0	0	0	0	0	0
Oligella	0	0	0	0	0	0	0	0	0	0	0	0	0	0	0	0	0	0	0	0	0	0	0	0	0	2	0	0	0	0	0	0	0	0	0	0
Olsenella	0	0	0	0	0	0	0	0	0	0	0	0	0	0	0	0	0	0	0	0	0	0	3	0	0	0	0	0	0	0	0	0	0	0	0	0
Oribacterium	0	0	0	0	0	0	0	0	0	0	0	0	0	0	0	0	0	0	0	0	0	0	0	0	0	5	4	0	0	0	0	0	0	0	0	2
Oscillibacter	0	0	0	0	0	0	0	0	0	0	0	0	0	0	0	0	0	0	0	0	0	0	0	0	0	0	0	0	0	0	0	4	0	0	0	0
Paenibacillus	0	0	0	0	0	0	0	0	0	0	0	0	0	0	0	0	0	0	0	0	0	0	0	0	0	0	0	0	0	0	0	0	0	1	0	0
Paludibacter	2	1	0	0	0	0	0	0	2	0	0	0	0	0	0	0	0	1	0	0	0	0	0	0	0	6	0	0	0	0	0	0	0	0	0	0
Pandoraea	0	0	0	0	0	0	0	0	0	0	0	0	0	0	0	0	0	0	0	0	0	0	0	0	0	0	0	0	0	0	0	0	2	0	0	0
Parabacteroides	0	0	0	0	0	0	0	0	0	3	4	0	0	0	0	3	0	0	0	0	0	0	0	0	0	0	0	0	0	0	0	0	0	0	0	0
Parachlamydia	0	0	0	0	0	0	0	0	0	0	0	0	0	0	0	0	0	0	0	0	0	0	0	0	0	0	0	3	0	0	0	0	0	0	0	0
Paracoccus	2	0	6	0	0	0	0	0	0	0	0	4	0	0	0	0	0	0	0	0	0	0	0	0	0	0	0	0	0	0	0	3	0	0	0	1
Paraprevotella	0	0	0	0	0	0	0	0	0	3	0	0	0	0	0	0	0	0	0	0	0	0	0	0	0	0	0	0	0	0	0	0	0	0	0	1
Parvimonas	19	1	0	0	0	0	0	0	0	10	0	0	0	0	0	0	0	0	106	0	1	0	0	1	0	0	0	2	2	0	0	0	0	4	0	0
Pediococcus	0	0	0	0	0	0	0	0	0	0	0	0	0	0	0	0	0	0	0	0	0	0	0	0	0	0	0	0	0	0	0	0	0	1	0	0
Pedobacter	0	0	1	0	0	0	0	0	0	0	0	0	0	0	0	0	0	0	0	0	0	0	0	0	0	0	0	0	0	0	0	0	0	0	0	0
Pelomonas	0	0	0	0	0	1	1	0	0	0	1	0	0	0	2	0	0	0	0	0	1	0	0	0	0	5	0	0	0	2	0	1	2	1	0	1
Peptococcus	0	0	0	0	0	0	0	0	0	0	0	0	0	0	0	0	0	0	0	0	1	0	18	0	0	0	0	0	0	0	0	0	2	0	0	0
Peptoniphilus	50	0	16	0	6	1	29	0	1	16	0	0	0	0	163	0	874	72	574	10	62	0	504	18	147	79	24	0	0	0	650	0	421	88	858	444
Peptostreptococcus	0	0	0	0	0	0	0	0	1	0	0	0	0	0	0	0	0	0	1	0	0	5	105	0	0	0	0	1	0	0	0	0	0	0	0	0
Petrobacter	0	0	0	0	0	0	0	0	0	0	1	0	0	0	0	0	0	0	1	0	0	0	0	0	0	0	0	0	0	0	0	0	0	0	0	0
Planomicrobium	0	0	0	0	0	0	0	0	0	0	0	7	0	0	0	0	0	0	0	0	0	0	0	0	0	0	0	0	0	0	0	0	0	0	0	0
Porphyromonas	10	3	19	0	0	1	3	3	2	0	0	15	0	0	35	0	47	0	79	0	7	22	1243	4	7	6	10	8	12	0	18	0	151	8	718	5
Prevotella	30	2	0	0	1	5	0	4	0	0	0	0	1	0	4	0	444	97	531	0	1	8	563	0	1	2	2	4	0	0	0	2	5	9	2132	1
Propionibacterium	14	14	20	0	2	7	3	8	19	79	37	15	0	9	66	4	2	5	3	44	57	10	0	12	11	1099	74	248	92	829	17	113	0	179	1	13
Propionimicrobium	18	0	0	0	0	0	0	0	0	0	0	0	0	0	0	0	509	1	53	0	0	1	9	0	0	0	0	0	0	0	0	0	0	0	1629	0
Providencia	0	0	0	0	0	4	2	0	0	0	0	0	0	0	0	0	0	0	0	0	0	0	0	0	0	0	0	0	0	0	0	0	0	0	0	0
Pseudomonas	0	0	30	0	0	0	0	0	3	0	0	1	0	0	6	18	2	0	0	0	0	8	0	1	0	9	0	7	0	3	2	10	4	2	0	0
Pseudoxanthomonas	0	0	0	0	0	0	0	0	0	0	0	0	0	0	0	0	0	0	1	0	0	0	0	0	0	0	0	0	0	0	0	0	0	0	0	0
Psychrobacter	0	0	0	0	0	0	0	0	0	0	0	4	0	0	0	0	0	0	0	2	4	0	0	0	15	0	0	0	0	0	0	0	0	80	0	0
Psychromonas	5	0	0	0	0	0	0	0	0	0	0	0	0	0	0	0	0	0	0	0	0	0	0	0	0	0	0	0	0	0	0	0	0	0	0	0
Pyramidobacter	0	0	0	0	0	0	0	0	0	0	0	0	0	0	0	0	0	0	0	0	0	0	22	0	0	0	0	0	0	0	0	0	0	0	0	0
Ralstonia	91	94	419	28	26	261	221	121	222	1039	732	768	10	113	962	308	230	245	34	35	237	927	13	85	140	703	264	750	1181	763	680	647	98	575	0	32
Rheinheimera	0	0	2	0	0	0	0	0	0	0	0	0	0	0	0	0	0	0	0	0	0	0	0	0	0	4	0	4	0	0	0	0	0	0	0	0
Rhizobium	0	0	0	0	0	0	0	0	0	0	2	0	0	1	0	0	0	0	0	0	1	0	0	0	1	0	0	0	0	1	0	0	0	0	0	0
Rhodobacter	5	0	8	0	1	7	5	2	7	24	18	14	1	4	17	17	1	2	0	1	2	29	0	0	2	24	5	19	10	13	7	36	0	7	0	2
Rhodococcus	0	0	0	0	0	1	1	0	0	0	0	1	0	0	0	0	0	0	0	0	0	0	0	0	0	0	0	0	0	0	0	0	0	0	0	0
Rhodopseudomonas	0	0	0	0	0	0	0	0	0	0	0	0	0	0	0	0	0	1	0	0	0	0	0	0	0	0	0	0	0	0	0	0	0	0	0	0
Roseateles	0	0	0	0	0	0	0	0	0	6	0	0	0	1	0	0	0	0	0	0	0	0	0	0	0	2	0	0	0	1	2	0	0	0	0	0
Roseomonas	0	0	0	0	0	0	0	0	0	0	2	0	0	0	0	0	0	0	0	0	1	0	0	0	0	0	0	0	0	0	0	0	0	0	0	0
Rothia	16	11	48	1	1	29	18	9	36	78	81	93	0	13	139	28	27	33	1	6	26	116	0	11	11	49	17	81	44	57	30	71	2	27	0	3
Rubellimicrobium	0	0	0	0	0	0	0	0	0	8	0	0	0	0	0	0	0	0	0	0	2	0	0	0	0	0	0	0	0	0	0	0	0	0	0	0
Ruminococcus	0	0	0	0	0	4	3	0	0	0	0	0	0	0	0	0	0	3	0	0	1	4	0	0	0	2	1	0	7	0	0	3	1	3	0	0
Salinicoccus	0	0	1	0	0	0	0	0	0	0	0	36	0	0	7	0	0	0	0	0	0	0	0	0	0	0	0	0	0	0	0	0	0	0	0	0
Selenomonas	0	0	0	0	0	5	0	0	0	0	0	0	0	0	0	0	0	4	0	0	0	0	0	0	0	0	0	1	0	0	0	0	0	3	0	0
Serratia	0	1	0	0	0	0	0	0	0	0	0	2	0	0	6	2	0	0	0	0	0	0	0	0	0	0	15	10	1	0	6	0	0	0	0	0
Shewanella	0	0	0	0	0	0	0	0	2	0	0	0	0	0	0	0	0	0	1	0	0	0	0	0	0	0	0	0	0	0	0	0	0	0	0	0
Shuttleworthia	0	0	0	0	0	0	0	0	0	0	0	0	0	1	0	0	0	1	0	0	0	0	0	1	0	0	0	0	0	0	0	0	0	0	0	0
Solobacterium	0	0	0	0	0	0	0	0	0	0	0	0	0	0	10	0	0	0	0	0	0	0	0	0	0	0	0	0	0	0	0	0	0	0	0	1
Sphingobacterium	0	0	0	0	0	0	0	0	0	0	0	2	0	0	0	0	0	0	0	0	0	0	0	0	0	2	0	0	0	0	0	0	0	0	0	0
Sphingobium	0	0	0	0	0	0	0	0	0	0	0	0	0	0	0	0	0	0	0	0	0	0	0	1	0	0	0	0	0	0	0	0	0	0	0	0
Sphingomonas	4	0	0	0	0	0	1	0	1	3	0	8	0	1	0	0	0	0	0	0	0	0	0	1	0	7	1	0	0	0	0	1	0	1	0	1
Sphingopyxis	0	0	0	0	0	0	0	0	0	0	0	7	0	0	0	0	0	0	0	0	0	0	0	0	0	0	0	0	0	0	0	0	0	0	0	0
Staphylococcus	13	410	2244	15	9	7	21	78	9	46	36	1470	0	2	668	6	5	442	58	1034	4664	18	3	1256	67	6092	717	14	453	5830	40	192	90	1020	1	514
Stenotrophomonas	0	0	0	0	0	1	1	0	0	12	0	0	0	0	0	1	0	0	0	0	0	0	0	0	0	0	2	0	0	0	0	0	0	0	0	1
Streptococcus	521	441	8326	106	258	1236	999	1510	1013	4035	4631	3326	21	10217	6028	1532	1005	996	117	146	770	3464	92	302	486	2511	576	2316	2177	1514	1537	3211	267	1629	6	104
Streptophyta	1	2	0	2	2	0	3	0	2	0	0	14	0	1	4	2	0	2	1	0	2	0	0	0	0	0	3	1	1	0	4	0	3	5	0	0
Subdivision3_genera_incertae_sedis	0	0	0	0	0	0	0	1	0	0	0	0	0	0	0	0	0	0	0	0	0	0	0	0	0	0	0	0	0	0	0	0	0	0	0	0
Subdoligranulum	0	0	0	1	0	4	0	2	0	6	0	5	0	0	0	0	0	0	0	0	0	0	0	0	0	0	0	1	3	0	0	0	0	0	0	0
Sutterella	0	0	0	0	0	0	0	0	0	0	0	0	0	0	0	0	0	0	0	0	0	0	12	0	0	0	0	0	0	0	0	0	0	3	0	0
TM7_genera_incertae_sedis	1	0	1	0	0	0	0	0	0	0	0	0	0	0	0	0	0	0	0	0	0	0	0	0	0	0	0	0	0	0	1	0	0	0	0	0
Tannerella	0	0	0	0	0	0	0	0	0	0	0	8	0	0	0	0	0	0	0	0	0	0	0	0	0	0	0	0	8	2	4	4	0	0	0	0
Terrabacter	0	0	0	0	0	0	0	0	0	1	0	0	0	0	0	0	0	0	0	0	0	0	0	0	0	0	0	0	0	0	0	0	0	0	0	0
Thauera	0	0	2	0	0	0	0	0	0	0	0	0	0	0	0	0	0	0	0	0	0	0	0	0	0	0	0	0	0	0	0	0	0	0	0	0
Tolumonas	0	0	0	0	0	0	0	1	0	0	0	0	0	0	0	0	0	0	0	0	0	0	0	0	0	0	0	0	0	0	0	5	0	0	0	1
Turicella	0	0	0	0	0	0	0	0	0	0	0	0	0	0	0	0	0	0	0	0	0	0	0	0	0	0	0	0	0	3	0	0	0	0	0	0
Turicibacter	0	0	0	0	0	0	0	0	0	0	0	0	0	0	1	0	0	0	0	0	0	0	0	0	0	0	0	0	0	0	0	0	0	0	0	0
Varibaculum	56	0	0	0	0	0	4	0	0	3	0	0	0	0	7	0	84	0	673	1	0	0	2	0	4	0	0	0	0	0	4	0	22	7	77	0
Variovorax	0	0	0	0	0	3	0	0	0	0	2	0	0	0	0	9	0	0	0	0	0	0	0	0	0	0	0	0	0	0	0	1	0	0	0	0
Veillonella	9	14	280	2	4	32	19	20	35	181	59	933	1222	4	113	50	11	34	1	3	47	119	0	20	10	62	17	83	90	46	42	123	6	44	2	6
Vibrio	0	0	0	0	0	0	1	0	0	0	0	0	0	1	3	2	0	0	0	1	0	0	0	0	1	1	1	0	0	10	1	5	0	1	0	0
Williamsia	0	0	0	0	0	4	0	0	0	0	0	0	0	0	0	0	0	0	0	0	0	0	0	0	0	2	0	0	0	1	0	0	0	2	0	0
Yaniella	0	0	9	0	0	0	0	0	0	0	0	0	0	0	0	0	0	0	0	0	4	0	0	0	0	0	0	0	0	0	0	0	0	0	0	0
Zavarzinella	0	0	0	0	0	2	0	0	0	0	0	0	0	0	0	0	0	0	0	0	0	0	0	0	0	0	0	0	0	0	0	0	0	0	0	0
Zimmermannella	0	0	0	0	2	0	0	0	0	0	0	0	0	0	0	0	0	1	0	0	0	0	2	0	0	0	0	0	245	0	0	0	0	4	0	5
Zoogloea	0	0	0	0	0	0	0	0	0	0	0	0	0	0	0	0	0	0	0	0	0	0	0	0	0	0	0	0	0	0	0	2	0	0	0	0
Month 1
HadVaginal	No	No	Yes	No	No	Yes	Yes	Yes	Yes	No	No	Yes	Yes	Yes	No	Yes	No	Yes	No	No	Yes	No	No	Yes	Yes	Yes	Yes	No	No	Yes	Yes	Yes	No	Yes	No	Yes
HadAnal	No	No	No	No	No	No	Yes	No	Yes	No	No	Yes	No	Yes	No	Yes	No	No	No	No	No	No	No	No	Yes	No	Yes	No	No	Yes	No	Yes	No	Yes	No	No
ReceivedOral	No	No	No	No	No	Yes	No	Yes	Yes	No	No	Yes	Yes	Yes	No	Yes	No	Yes	No	No	No	No	No	Yes	No	Yes	Yes	No	No	Yes	Yes	Yes	No	Yes	No	Yes
Total High-quality Seq	10056	8412	N/A	10038	13052	9035	1	9626	N/A	8979	N/A	N/A	12168	9255	7069	7083	8543	5436	8616	13159	12160	7335	11954	9652	11627	7330	14391	8755	7859	9995	16617	11375	12647	8766	14813	10924
Acetivibrio	1	0	0	0	0	0	0	0	0	0	0	0	0	0	0	0	0	0	0	0	0	0	1	0	0	0	0	0	0	0	0	0	0	0	0	0
Acidovorax	0	0	0	0	0	0	0	0	0	0	0	0	0	9	0	0	0	0	0	0	0	0	0	0	0	4	0	0	0	0	0	0	0	0	0	0
Acinetobacter	0	4	0	0	0	0	0	2	0	5	0	0	0	14	59	0	0	0	7	0	2	51	0	18	0	0	6	0	7	9	0	0	0	8	0	4
Actinobacillus	0	0	0	0	0	0	0	0	0	0	0	0	0	0	0	0	0	0	0	0	0	0	0	0	0	1	0	0	0	0	0	0	0	0	0	0
Actinobaculum	88	0	0	0	0	0	0	3	0	0	0	0	0	0	0	0	265	0	86	0	0	0	0	0	0	0	0	0	0	0	0	0	0	0	134	0
Actinomyces	5	0	0	1	1	4	0	87	0	135	0	0	11	0	0	25	10	0	10	0	3	127	5	99	16	2	20	26	265	0	20	523	100	0	1	232
Actinoplanes	0	0	0	0	0	0	0	0	0	0	0	0	0	0	0	0	0	0	0	0	0	0	0	0	0	0	0	0	0	0	1	0	0	0	0	0
Adlercreutzia	0	0	0	0	0	0	0	0	0	0	0	0	0	0	0	0	0	0	0	0	0	0	0	0	1	0	0	0	0	0	0	0	0	0	0	0
Aerococcus	0	1	0	0	0	0	0	4	0	5	0	0	1913	0	0	0	0	0	0	0	0	9	0	0	4	0	0	0	0	0	0	0	0	0	0	0
Aeromicrobium	0	0	0	0	0	0	0	0	0	0	0	0	0	0	0	0	0	0	0	0	0	0	0	0	0	0	0	0	9	0	0	0	0	0	0	0
Aeromonas	0	0	0	0	0	0	0	0	0	0	0	0	0	17	0	0	0	0	0	0	0	0	0	0	0	0	0	0	0	0	0	0	0	0	0	0
Afipia	0	0	0	0	0	0	0	2	0	9	0	0	0	0	0	0	0	0	0	0	0	0	0	0	0	0	0	0	0	0	0	0	0	0	0	0
Aggregatibacter	0	0	0	0	0	0	0	0	0	0	0	0	0	0	0	0	0	0	0	0	0	0	0	0	0	5	0	0	0	0	0	2	0	0	0	0
Agrococcus	0	3	0	0	0	0	0	0	0	0	0	0	0	0	0	0	0	0	0	0	0	0	0	1	0	0	0	0	0	0	0	0	0	0	0	0
Akkermansia	0	0	0	0	0	0	0	0	0	0	0	0	0	0	0	0	0	0	0	0	0	0	0	0	4	0	1	0	0	0	0	0	0	0	0	0
Alicyclobacillus	0	0	0	0	0	0	0	0	0	0	0	0	0	0	0	0	0	0	0	1	0	0	0	0	0	0	0	0	0	0	0	0	0	0	0	0
Alloiococcus	0	0	0	0	0	0	0	1	0	0	0	0	0	0	0	0	0	0	0	0	0	0	0	0	0	0	0	0	0	0	0	0	0	0	0	0
Anaerococcus	39	197	0	90	73	8	0	368	0	355	0	0	5	134	332	66	26	20	204	1962	2148	235	701	803	3640	539	5301	0	26	4	5108	810	1938	339	1	1645
Anaerosphaera	0	0	0	0	0	0	0	0	0	0	0	0	0	0	0	0	0	0	0	0	0	0	0	0	0	0	1	0	0	0	0	0	0	0	0	0
Aquabacterium	0	0	0	0	0	0	0	0	0	0	0	0	0	0	0	0	0	0	0	0	0	0	0	0	0	0	1	0	0	0	0	0	0	0	0	0
Arthrobacter	0	2	0	0	0	0	0	3	0	0	0	0	0	18	16	0	4	0	0	2	2	0	0	3	0	0	44	0	10	0	0	0	0	0	0	0
Atopobium	7	0	0	0	0	0	0	8	0	0	0	0	0	0	0	0	0	0	14	0	0	0	0	2	0	0	0	0	12	0	0	0	0	0	0	0
Aurantimonas	0	0	0	0	0	0	0	0	0	0	0	0	0	0	0	0	0	0	0	0	0	0	0	0	0	0	0	0	0	13	0	0	0	16	0	0
Azomonas	0	0	0	0	0	0	0	0	0	0	0	0	0	0	0	0	1	0	0	0	0	0	0	0	0	0	0	0	0	97	0	0	0	0	0	0
Bacillariophyta	0	0	0	0	0	0	0	0	0	0	0	0	0	0	0	0	7	0	0	0	0	0	0	1	0	0	0	0	0	0	0	0	0	0	0	0
Bacillus	0	0	0	0	0	23	0	0	0	0	0	0	0	0	0	0	0	0	0	0	0	0	0	0	0	0	0	1	0	33	0	0	0	0	0	0
Bacteriovorax	0	0	0	0	0	0	0	1	0	0	0	0	0	0	0	0	0	0	0	0	0	0	0	0	0	0	0	0	0	0	0	0	0	0	0	0
Bacteroides	0	0	0	0	0	0	0	25	0	34	0	0	0	0	0	0	11	0	0	0	0	3	0	0	2	0	0	0	0	0	0	0	0	0	0	0
Bifidobacterium	1	0	0	1	0	0	0	4	0	17	0	0	0	0	43	0	0	0	0	0	0	0	0	3	28	0	0	21	59	0	0	0	7	0	0	0
Blastococcus	0	0	0	0	0	0	0	3	0	3	0	0	0	0	0	0	0	0	0	0	0	0	0	0	0	0	0	0	0	0	0	0	0	0	0	0
Blautia	0	0	0	3	0	0	0	5	0	0	0	0	0	8	0	0	0	0	0	0	0	0	0	0	13	0	0	0	0	0	0	0	1	0	0	2
Bosea	0	0	0	0	0	0	0	0	0	0	0	0	0	0	0	0	0	0	0	0	0	0	0	5	0	0	0	0	0	0	0	0	0	0	0	0
Brachybacterium	0	18	0	0	1	0	0	5	0	1	0	0	0	0	0	0	0	0	0	0	0	0	0	0	0	0	0	11	4	0	0	0	0	0	0	0
Bradyrhizobium	0	0	0	0	0	0	0	0	0	0	0	0	0	0	0	0	6	0	0	0	0	0	0	0	0	0	0	0	0	0	0	0	0	0	0	0
Brevibacterium	0	1	0	0	21	0	0	1	0	0	0	0	0	0	0	56	0	23	0	0	0	17	1	0	1	43	0	67	0	0	1	0	28	198	0	66
Brevundimonas	0	0	0	0	0	0	0	0	0	0	0	0	0	0	0	0	0	24	0	0	0	0	0	0	0	0	0	0	0	0	0	0	0	0	0	0
Brochothrix	0	0	0	0	0	0	0	0	0	0	0	0	0	0	0	0	0	0	0	0	0	0	0	0	0	0	0	0	0	0	0	0	0	1	0	0
Burkholderia	0	5	0	1	0	3	0	3	0	8	0	0	0	12	0	0	0	0	2	0	0	6	0	0	0	0	0	3	8	0	0	0	0	0	0	0
Caldilinea	0	0	0	0	0	0	0	0	0	0	0	0	0	0	0	0	0	0	0	0	0	0	0	1	0	0	0	0	0	0	0	0	0	0	0	0
Campylobacter	386	0	0	1	0	17	0	177	0	1	0	0	0	28	19	0	158	0	260	1	2	9	2645	285	103	2	0	0	0	0	117	8	0	8	1070	0
Capnocytophaga	0	0	0	0	0	0	0	0	0	0	0	0	0	0	0	0	0	0	0	0	0	0	0	0	0	0	0	0	0	0	0	8	0	0	0	0
Cardiobacterium	0	0	0	0	0	0	0	0	0	0	0	0	0	0	0	0	0	0	0	0	0	0	0	0	0	0	0	0	0	0	0	4	0	0	0	0
Carnobacterium	0	0	0	0	0	0	0	0	0	0	0	0	0	0	0	0	0	0	0	0	0	0	0	0	0	0	0	0	5	0	0	0	0	0	0	0
Catonella	0	0	0	0	0	0	0	0	0	0	0	0	0	0	0	0	0	0	0	0	0	0	0	0	0	0	0	0	0	0	0	7	0	0	0	0
Cellulomonas	0	0	0	0	0	0	0	0	0	0	0	0	0	0	0	0	0	0	0	1	0	0	0	0	0	0	0	0	0	0	0	0	0	0	0	0
Cellvibrio	0	0	0	0	0	0	0	0	0	0	0	0	0	0	0	0	0	0	0	1	0	0	0	7	0	0	0	0	0	0	0	0	0	0	0	0
Chlamydia	0	0	0	0	0	0	0	0	0	0	0	0	0	0	0	0	0	0	0	0	0	0	0	1	0	0	0	0	0	0	0	0	0	0	0	0
Chlorophyta	0	0	0	0	0	1	0	0	0	2	0	0	0	0	0	0	0	0	0	0	0	0	0	1	0	0	0	0	0	0	0	0	0	6	0	0
Chryseobacterium	0	1	0	0	0	0	0	0	0	0	0	0	0	0	0	0	0	0	0	0	0	0	0	0	0	0	0	9	6	0	0	0	0	2	0	0
Citricoccus	0	0	0	0	0	0	0	0	0	0	0	0	0	0	0	0	0	0	0	0	0	0	0	0	0	0	0	0	1	0	0	0	0	0	0	0
Citrobacter	0	0	0	3	0	0	0	0	0	0	0	0	0	0	0	0	0	0	0	1	3	0	0	0	0	8	2	0	0	0	1	0	0	5	0	1
Clostridium	0	0	0	0	0	0	0	3	0	1	0	0	0	0	0	0	0	0	0	0	0	0	0	32	0	0	0	0	0	0	0	0	1	0	0	0
Collinsella	0	0	0	0	0	0	0	5	0	2	0	0	0	0	0	0	0	0	0	1	0	0	0	0	4	0	0	0	0	0	0	0	0	0	0	0
Comamonas	0	0	0	0	0	3	0	0	0	0	0	0	0	0	0	0	0	0	0	0	0	0	0	0	0	0	0	0	0	0	0	0	0	0	0	0
Conchiformibius	0	0	0	0	0	0	0	0	0	0	0	0	0	0	0	0	0	0	0	0	0	0	0	10	0	0	0	0	0	0	0	0	0	0	0	0
Corynebacterium	18	1129	0	138	242	6	0	320	0	403	0	0	38	333	314	1553	29	42	156	5257	5110	2161	16	1799	869	3435	4312	337	3152	61	4805	3822	2045	5620	0	1145
Craurococcus	0	0	0	0	0	0	0	0	0	0	0	0	0	0	0	0	0	0	0	0	0	0	0	0	0	0	0	0	0	0	0	5	0	0	0	0
Cryptomonadaceae	0	0	0	0	0	0	0	0	0	0	0	0	0	0	0	0	5	0	0	0	0	0	0	0	0	0	0	0	0	0	0	0	0	0	0	0
Cupriavidus	0	0	0	0	0	0	0	0	0	0	0	0	0	0	0	0	3	0	0	0	0	0	0	0	0	0	0	0	0	0	0	0	0	0	0	0
Deinococcus	0	0	0	0	0	2	0	1	0	0	0	0	0	0	0	0	0	23	0	0	0	0	1	0	0	0	0	29	0	0	0	0	0	0	0	0
Demetria	0	0	0	0	0	0	0	0	0	0	0	0	0	0	0	0	0	0	0	0	0	0	0	0	0	0	0	16	0	0	0	0	0	0	0	0
Dermabacter	0	0	0	4	0	0	0	1	0	0	0	0	0	0	0	8	0	0	15	19	31	10	0	2	1	206	119	0	0	0	7	88	7	67	0	117
Desemzia	0	0	0	0	0	0	0	0	0	0	0	0	0	0	0	0	0	0	0	0	0	0	0	0	0	0	0	0	0	0	1	0	0	0	0	0
Devosia	0	16	0	0	0	0	0	0	0	0	0	0	0	0	0	0	0	0	0	1	0	0	0	0	0	0	0	0	0	0	0	0	0	0	0	0
Dialister	797	0	0	0	0	0	0	54	0	0	0	0	0	0	0	0	18	0	339	0	1	6	556	14	16	0	2	0	1	0	3	0	0	0	104	0
Dietzia	0	5	0	0	0	0	0	0	0	0	0	0	0	0	0	0	0	0	0	0	1	0	0	0	0	0	0	0	0	0	0	0	0	0	0	0
Dolosigranulum	0	0	0	0	0	0	0	0	0	0	0	0	0	0	0	0	0	0	0	0	0	0	0	1177	13	26	0	0	0	0	95	0	2	0	0	0
Dyadobacter	0	0	0	0	0	0	0	0	0	0	0	0	0	0	0	0	0	0	0	0	0	0	0	0	0	0	2	0	0	0	0	0	0	0	0	0
Eggerthella	0	0	0	0	0	0	0	0	0	0	0	0	0	0	0	0	0	0	2	0	0	0	0	0	0	0	0	0	0	0	0	0	0	0	0	0
Emticicia	0	0	0	0	0	0	0	0	0	0	0	0	0	0	0	4	0	0	0	0	0	0	0	0	0	0	0	0	0	0	0	0	0	0	0	0
Enhydrobacter	0	0	0	0	1	0	0	0	0	0	0	0	0	0	0	0	0	0	8	0	0	17	0	4	1	0	0	0	0	0	0	0	0	0	0	0
Enterobacter	0	0	0	0	0	0	0	0	0	0	0	0	0	0	0	0	0	0	0	0	0	0	0	0	0	0	0	0	0	1	0	0	0	0	0	0
Enterococcus	0	0	0	0	0	4	0	0	0	0	0	0	0	0	0	0	47	0	0	0	2	0	1	0	0	0	0	9	0	0	0	0	0	0	9	0
Eremococcus	1	0	0	0	0	0	0	0	0	0	0	0	0	0	0	0	0	0	0	0	0	0	0	0	0	0	0	0	0	0	0	0	0	0	0	0
Escherichia/Shigella	22	0	0	3	0	57	0	429	0	52	0	0	0	45	108	18	67	1	18	0	5	5	0	64	3	1	0	14	48	4	0	0	0	6	0	0
Ethanoligenens	0	0	0	0	0	0	0	0	0	0	0	0	0	0	0	0	0	0	0	0	0	0	0	0	0	0	0	20	11	2	0	0	0	8	0	0
Exiguobacterium	0	0	0	0	0	0	0	0	0	0	0	0	0	0	0	0	0	0	0	0	0	0	0	0	0	0	0	0	7	0	0	0	0	0	0	0
Facklamia	0	9	0	8	16	0	0	29	0	72	0	0	0	0	29	0	30	0	0	1	15	82	0	8	267	4	0	0	0	0	0	0	80	0	0	19
Faecalibacterium	0	0	0	0	0	0	0	20	0	21	0	0	0	0	0	0	0	0	0	0	0	2	0	0	2	0	0	0	0	0	0	0	0	0	0	0
Fastidiosipila	101	9	0	5	5	0	0	8	0	1	0	0	0	0	0	0	0	0	43	0	0	0	1	0	50	0	0	0	0	0	83	0	41	0	0	2
Filifactor	0	0	0	0	0	0	0	0	0	0	0	0	0	0	0	0	0	0	0	0	0	0	0	0	0	0	0	0	15	0	0	0	0	0	0	0
Finegoldia	5	0	0	57	2	0	0	128	0	149	0	0	1	0	111	362	25	0	156	27	141	6	30	153	587	156	204	0	0	4	651	605	355	134	0	985
Flavobacterium	0	0	0	0	0	1	0	0	0	0	0	0	0	0	0	2	0	0	0	0	0	0	0	1	0	0	0	0	0	0	0	0	0	0	0	0
Friedmanniella	0	0	0	0	0	0	0	0	0	0	0	0	0	0	0	0	0	0	0	0	0	0	0	2	0	0	0	0	0	0	0	0	0	0	0	0
Fusobacterium	0	0	0	0	0	0	0	11	0	4	0	0	0	0	0	0	13	0	0	0	0	5	6	0	0	0	0	0	3	0	0	24	0	0	1	0
Gardnerella	0	0	0	1298	111	0	0	567	0	0	0	0	103	0	0	0	0	0	0	0	0	0	0	0	0	0	0	0	0	0	0	0	0	0	0	0
Gemella	2	0	0	2	0	20	0	239	0	320	0	0	1	0	0	0	19	0	0	0	1	116	0	21	0	0	0	0	38	1	0	231	0	0	0	0
Gemmatimonas	0	0	0	1	0	0	0	0	0	0	0	0	0	0	0	0	0	0	0	0	0	0	0	0	0	0	0	0	0	0	0	0	0	0	0	0
Geobacillus	0	0	0	0	0	0	0	0	0	0	0	0	0	0	0	0	0	221	0	0	0	0	0	2	0	0	0	0	0	0	0	0	0	0	0	0
Gordonia	0	0	0	0	0	0	0	3	0	13	0	0	0	0	0	0	0	0	0	0	1	0	0	0	0	0	0	0	0	0	0	0	0	0	0	0
Gp4	0	0	0	0	0	0	0	0	0	0	0	0	0	0	0	0	0	0	3	0	0	0	0	0	0	0	0	0	0	0	0	0	0	0	0	0
Gp6	0	0	0	0	0	0	0	0	0	0	0	0	0	0	0	0	0	0	0	2	0	0	0	0	0	0	0	0	0	0	0	0	0	4	0	0
Granulicatella	0	0	0	0	3	0	0	0	0	0	0	0	0	0	0	0	0	0	0	0	2	1	0	4	0	0	0	0	17	0	0	102	0	0	0	0
Haliscomenobacter	0	0	0	0	0	0	0	0	0	0	0	0	0	0	0	0	0	0	0	0	0	0	0	1	0	0	0	0	0	0	0	0	0	0	0	0
Hallella	0	0	0	0	0	0	0	0	0	0	0	0	0	0	0	0	0	0	0	0	0	0	1	0	0	0	0	0	0	0	0	0	0	0	0	0
Haloferula	0	0	0	0	0	0	0	0	0	0	0	0	0	0	0	0	0	0	0	0	0	0	0	0	0	0	0	0	0	0	1	0	0	0	0	0
Halomonas	0	0	0	0	0	0	0	0	0	0	0	0	0	0	0	0	0	0	0	0	0	0	0	62	0	0	0	0	0	0	0	0	0	0	0	0
Helcococcus	0	0	0	0	7	7	0	0	0	0	0	0	0	0	0	0	47	0	0	0	0	0	0	9	1	0	0	0	0	0	0	0	0	0	44	0
Herbaspirillum	0	0	0	0	0	0	0	0	0	2	0	0	0	0	23	0	4	0	0	0	0	0	0	0	0	0	1	0	0	0	0	0	0	8	0	0
Herpetosiphon	0	0	0	0	0	0	0	2	0	0	0	0	0	0	0	0	0	0	0	0	0	0	0	0	0	0	0	0	0	0	0	0	0	0	0	0
Howardella	0	0	0	0	0	0	0	0	0	0	0	0	0	0	0	0	12	0	0	0	0	0	6	0	0	0	0	0	0	0	0	0	0	0	4	0
Hydrogenophaga	0	0	0	0	0	0	0	0	0	0	0	0	0	0	0	5	0	0	0	0	0	0	0	0	0	0	0	0	0	0	0	0	0	0	0	0
Hymenobacter	0	0	0	0	0	0	0	0	0	0	0	0	0	0	0	0	9	0	0	0	0	0	0	0	0	0	0	0	0	0	0	0	0	0	0	0
Hyphomicrobium	0	0	0	0	0	0	0	0	0	0	0	0	0	0	0	0	0	0	5	0	0	0	0	0	0	0	0	0	0	0	0	0	0	0	0	0
Iamia	0	0	0	0	0	0	0	0	0	0	0	0	0	0	0	0	0	0	0	0	0	0	0	0	0	0	0	0	0	0	0	0	0	13	0	0
Janibacter	0	0	0	0	0	0	0	0	0	0	0	0	0	0	0	0	0	0	0	0	0	0	0	0	0	0	1	0	0	0	0	0	0	0	0	0
Janthinobacterium	0	0	0	0	0	0	0	1	0	0	0	0	0	0	0	0	0	0	0	0	0	0	0	3	0	6	3	0	8	1	0	0	0	0	0	0
Jeotgalicoccus	0	36	0	0	0	0	0	90	0	93	0	0	0	0	0	0	0	0	0	0	4	0	0	5	55	0	1	0	0	0	0	0	1	0	0	0
Kingella	0	0	0	0	0	0	0	4	0	16	0	0	0	0	0	0	0	0	0	0	0	0	0	0	0	0	0	0	0	0	0	0	0	0	0	0
Klebsiella	0	0	0	0	0	0	0	0	0	0	0	0	0	0	0	0	0	0	0	0	27	0	3	0	0	0	30	0	0	0	19	0	21	0	0	0
Kocuria	0	20	0	0	0	0	0	0	0	0	0	0	0	0	0	0	0	0	0	1	5	4	1	0	0	4	0	0	5	2	0	0	0	0	0	0
Lactobacillus	1	0	0	4120	989	0	0	3	0	740	0	0	2392	0	0	0	0	0	0	0	0	0	4	0	5	0	3	180	0	0	1	4	0	0	0	0
Lactococcus	0	0	0	0	0	0	0	0	0	0	0	0	0	0	0	0	0	9	15	0	0	0	0	4	1	5	0	450	0	0	0	0	0	1	0	0
Leifsonia	0	0	0	0	0	0	0	0	0	0	0	0	0	0	0	0	0	0	0	0	0	0	0	0	0	0	0	0	10	0	0	0	0	0	0	0
Leptothrix	0	0	0	0	0	0	0	0	0	0	0	0	0	1	0	0	0	0	0	0	0	0	0	1	0	0	0	0	0	0	0	0	0	0	0	0
Leptotrichia	0	0	0	0	0	0	0	0	0	0	0	0	0	0	0	0	0	0	0	0	0	1	0	0	0	0	0	0	0	0	0	43	0	0	0	0
Leucobacter	0	0	0	0	0	0	0	0	0	0	0	0	0	0	0	0	0	0	0	0	0	0	0	0	0	0	0	0	0	0	0	2	0	0	0	0
Leuconostoc	0	0	0	0	0	0	0	0	0	0	0	0	0	0	0	0	0	0	0	0	0	7	0	3	0	0	0	19	0	0	0	0	0	0	0	0
Mannheimia	0	0	0	0	0	0	0	15	0	17	0	0	0	1	0	0	2	0	0	0	0	1	0	3	0	0	0	0	0	0	0	13	0	0	0	0
Marinomonas	2	0	0	0	0	13	0	35	0	0	0	0	0	0	0	0	8	0	4	0	0	0	0	0	0	0	0	0	0	0	0	0	0	0	0	0
Marinospirillum	0	0	0	0	0	0	0	0	0	0	0	0	0	0	0	0	0	0	0	0	4	0	0	4	0	0	0	0	0	0	0	0	0	0	0	0
Massilia	0	0	0	0	0	0	0	0	0	0	0	0	0	0	0	0	0	0	0	0	0	0	0	2	0	0	8	0	13	704	0	0	0	0	0	0
Megamonas	0	0	0	0	0	0	0	0	0	0	0	0	0	0	0	0	0	0	0	0	0	3	0	0	0	0	0	0	0	0	0	0	0	0	0	0
Methylibium	0	0	0	0	0	0	0	0	0	0	0	0	0	0	0	0	0	0	0	1	0	0	0	0	0	0	0	0	0	0	0	0	0	0	0	0
Methylobacter	0	0	0	0	0	0	0	0	0	0	0	0	0	0	0	0	0	0	0	0	0	0	0	6	0	0	0	0	0	0	0	0	0	0	0	0
Methylobacterium	0	0	0	6	1	3	0	9	0	11	0	0	1	16	0	0	0	94	0	1	0	20	0	8	0	0	0	0	28	331	0	0	0	0	0	0
Methylophilus	0	0	0	0	0	0	0	0	0	0	0	0	0	0	0	0	0	0	0	0	0	0	0	0	0	0	0	0	0	1	0	0	0	0	0	0
Microbacterium	0	1	0	0	0	2	0	0	0	0	0	0	0	0	0	0	0	0	0	0	1	0	0	2	0	0	0	0	19	0	0	0	0	2	0	0
Micrococcus	0	74	0	0	0	0	0	32	0	46	0	0	0	16	0	0	0	0	7	1	5	15	0	9	62	0	31	11	0	0	0	1	1	39	0	0
Mobiluncus	357	0	0	0	3	0	0	66	0	1	0	0	0	26	41	12	857	0	545	1	0	28	42	9	0	0	2	0	0	0	0	0	90	8	619	0
Modestobacter	0	0	0	0	0	0	0	0	0	0	0	0	0	0	2	0	0	14	0	0	0	0	0	0	0	0	0	0	0	0	0	0	0	0	0	0
Mogibacterium	0	0	0	0	0	0	0	0	0	0	0	0	0	0	0	0	0	0	0	0	0	0	3	0	0	0	0	0	0	0	0	0	0	0	0	0
Moraxella	0	0	0	0	0	0	0	0	0	0	0	0	0	0	0	0	0	0	4	0	0	0	0	7	41	12	0	33	0	0	0	0	0	0	0	0
Moryella	0	0	0	0	0	0	0	0	0	0	0	0	0	0	0	0	0	0	0	0	0	6	15	0	0	0	0	0	0	0	0	1	0	0	0	0
Mycobacterium	1	0	0	0	0	0	0	10	0	12	0	0	0	0	0	0	0	0	0	0	0	0	0	0	0	0	0	0	0	0	0	0	0	0	0	0
Neisseria	0	0	0	0	0	0	0	0	0	0	0	0	0	0	0	0	0	0	0	0	0	24	0	2	3	0	0	1	0	0	1	631	0	0	0	0
Nosocomiicoccus	0	0	0	0	0	0	0	0	0	0	0	0	0	0	0	0	0	0	0	0	0	0	0	0	6	0	0	0	0	0	0	0	1	0	0	0
Oceanobacillus	0	0	0	0	0	0	0	0	0	0	0	0	0	0	0	0	0	0	0	0	0	0	0	5	0	0	0	0	0	0	0	0	0	0	0	0
Oligella	0	0	0	0	0	0	0	0	0	0	0	0	0	0	0	0	0	0	0	0	0	0	0	0	0	1	0	0	0	0	0	0	0	0	0	0
Olsenella	0	0	0	0	0	0	0	0	0	0	0	0	0	0	0	0	0	0	0	0	0	0	3	0	0	0	0	0	10	0	0	0	0	0	0	0
Opitutus	0	0	0	1	0	0	0	0	0	0	0	0	0	3	0	0	0	0	0	0	0	0	0	1	0	0	0	0	0	0	0	0	0	0	0	0
Oribacterium	0	0	0	0	0	0	0	0	0	0	0	0	0	0	0	0	0	0	0	0	0	0	0	0	0	0	0	0	0	0	0	10	0	0	0	0
Oscillibacter	0	0	0	0	0	0	0	0	0	0	0	0	0	0	0	0	0	0	0	0	0	0	0	0	3	0	0	0	0	0	0	0	0	0	0	0
Paenibacillus	0	0	0	0	0	0	0	0	0	0	0	0	0	0	0	0	0	0	0	0	0	0	0	2	0	0	0	0	0	0	0	0	0	0	0	0
Paludibacter	1	0	0	0	0	0	0	0	0	0	0	0	0	0	0	0	0	0	0	0	0	0	0	0	0	0	0	0	0	0	0	0	0	0	0	0
Parabacteroides	0	0	0	0	0	0	0	0	0	0	0	0	0	0	0	0	0	0	0	0	0	0	0	0	1	0	0	0	0	0	0	0	0	0	0	0
Paracoccus	0	11	0	0	0	0	0	2	0	0	0	0	0	0	0	0	0	0	0	0	2	0	0	16	0	0	6	0	0	0	1	7	0	32	0	0
Paraprevotella	0	0	0	0	0	0	0	0	0	0	0	0	0	0	0	0	0	0	0	0	0	0	0	0	0	0	0	0	0	0	0	1	0	0	0	0
Parvimonas	230	0	0	2	0	11	0	23	0	2	0	0	0	0	0	0	0	0	215	0	0	0	0	0	0	2	0	0	16	0	0	0	0	0	0	0
Pedobacter	0	0	0	0	0	0	0	0	0	0	0	0	0	0	0	0	0	0	0	0	0	0	0	3	0	0	0	0	0	0	0	0	0	0	0	0
Pelomonas	0	2	0	0	0	0	0	0	0	3	0	0	0	19	0	4	2	11	0	0	0	9	0	0	0	0	1	10	0	0	0	0	0	0	0	1
Peptococcus	0	0	0	0	5	0	0	0	0	0	0	0	0	0	0	0	0	0	1	0	0	0	18	0	1	0	0	0	0	0	3	0	7	0	4	0
Peptoniphilus	684	18	0	33	42	8	0	199	0	74	0	0	0	0	59	13	463	14	946	68	102	0	394	521	772	28	219	0	0	3	887	24	586	15	619	2340
Peptostreptococcus	0	0	0	0	0	0	0	0	0	0	0	0	0	1	0	0	0	0	0	0	0	11	0	4	1	0	0	0	7	0	0	2	0	0	0	0
Peredibacter	0	0	0	0	0	0	0	0	0	0	0	0	0	0	0	0	0	0	2	0	0	0	0	0	0	0	0	0	0	0	0	0	0	0	0	0
Perlucidibaca	0	0	0	0	0	2	0	0	0	0	0	0	0	0	0	0	0	0	0	0	1	0	0	0	0	0	0	0	0	0	0	0	0	0	0	0
Phenylobacterium	0	0	0	0	0	3	0	1	0	0	0	0	0	0	0	0	0	0	0	0	1	0	0	0	0	0	0	0	0	0	0	0	0	0	0	0
Phyllobacterium	0	0	0	0	0	0	0	0	0	0	0	0	0	0	0	0	0	0	0	0	1	0	0	0	0	0	0	0	0	0	0	0	0	0	0	0
Planococcus	0	0	0	0	0	0	0	0	0	0	0	0	0	0	0	0	0	0	0	0	0	0	0	1	0	0	0	0	0	0	0	0	0	0	0	0
Planomicrobium	0	6	0	0	0	0	0	0	0	0	0	0	0	0	0	0	0	0	0	0	0	0	0	0	0	0	0	0	0	0	0	0	0	0	0	0
Polaromonas	0	0	0	0	0	0	0	0	0	0	0	0	0	0	7	0	0	0	0	0	2	0	0	8	0	0	0	0	0	0	0	0	0	0	0	0
Porphyromonas	289	0	0	0	1	0	0	30	0	8	0	0	0	22	33	0	50	0	68	2	19	3	1213	0	2453	0	2	0	0	0	225	26	758	0	289	7
Prevotella	729	0	0	0	1	12	0	67	0	2	0	0	0	0	0	0	269	0	387	0	2	12	585	137	28	5	0	0	0	0	103	1	15	1	1246	5
Propionibacterium	11	15	0	4	2	17	0	59	0	33	0	0	1	22	380	5	12	0	10	51	28	85	0	1195	1	325	12	80	168	10	116	12	0	118	1	12
Propionimicrobium	131	0	0	0	0	4	0	39	0	0	0	0	0	0	0	12	573	0	54	0	0	0	21	1	2	0	0	0	0	0	0	0	4	0	1645	0
Prosthecobacter	0	0	0	0	0	0	0	0	0	0	0	0	0	0	0	0	0	0	0	0	1	0	0	0	0	0	0	0	0	0	0	0	0	0	0	0
Providencia	0	0	0	0	0	0	0	0	0	3	0	0	0	0	0	0	0	0	0	0	0	0	0	0	0	0	0	0	0	0	0	0	0	0	0	0
Pseudolabrys	0	0	0	0	0	0	0	0	0	0	0	0	0	13	0	0	0	0	0	0	0	0	0	0	0	0	0	0	0	0	0	0	0	0	0	0
Pseudomonas	1	0	0	0	1	13	0	2	0	7	0	0	0	89	201	12	8	29	15	2	4	3	0	29	4	11	1	4	23	2026	0	0	0	1	0	10
Psychrobacter	0	146	0	0	0	0	0	0	0	0	0	0	0	20	0	0	0	0	0	2	4	0	0	0	0	0	0	0	9	0	0	0	0	2	0	0
Psychromonas	0	0	0	0	0	0	0	6	0	0	0	0	0	0	0	0	0	0	0	0	0	0	0	9	0	0	0	0	0	0	0	0	0	0	0	0
Pyramidobacter	0	0	0	0	0	0	0	0	0	0	0	0	0	0	0	0	0	0	0	0	0	0	36	0	0	0	0	0	0	0	0	0	0	0	0	0
Ralstonia	23	177	0	127	65	159	1	1118	0	1363	0	0	89	1924	3755	1013	599	4535	587	46	175	1922	10	828	23	775	171	3015	2038	528	43	218	65	1233	3	139
Rheinheimera	0	4	0	0	0	0	0	0	0	0	0	0	0	0	0	0	0	0	0	0	0	0	0	0	0	0	0	6	0	0	1	0	0	0	0	0
Rhizobium	0	0	0	0	0	0	0	0	0	0	0	0	0	0	0	4	0	0	0	0	0	0	0	2	0	0	0	0	0	0	0	0	0	0	0	0
Rhodobacter	2	0	0	0	0	0	0	28	0	33	0	0	0	0	0	0	22	0	0	0	1	0	0	3	0	0	0	0	11	0	0	0	0	0	0	0
Rhodococcus	0	0	0	0	0	0	0	4	0	5	0	0	0	0	0	0	0	20	0	0	0	0	0	0	0	0	0	0	0	0	0	0	0	0	0	0
Rhodoferax	0	0	0	0	0	0	0	0	0	0	0	0	0	0	1	0	0	1	0	0	0	0	0	6	0	0	0	0	0	1	0	0	0	0	0	0
Roseateles	0	0	0	0	0	0	0	0	0	2	0	0	0	0	0	0	0	0	0	0	0	0	0	0	0	1	0	29	0	0	0	0	0	0	0	0
Roseburia	0	0	0	0	0	0	0	0	0	0	0	0	0	0	0	0	0	0	0	0	0	0	0	0	1	0	0	0	0	0	0	0	0	0	0	0
Roseomonas	0	0	0	0	1	0	0	0	0	0	0	0	0	0	0	0	36	0	0	0	0	0	0	0	0	0	0	0	0	0	0	0	0	50	0	0
Rothia	2	0	0	0	0	0	0	73	0	85	0	0	0	0	0	0	8	0	0	0	2	9	0	0	0	0	0	0	22	0	1	2	0	0	0	0
Rubellimicrobium	0	0	0	0	0	0	0	0	0	0	0	0	0	0	0	0	9	0	0	0	1	0	0	0	0	0	0	0	0	0	0	0	0	0	0	0
Rubrobacter	0	0	0	0	0	0	0	0	0	0	0	0	0	0	0	0	0	0	0	0	0	0	0	0	0	0	0	0	0	0	1	0	0	0	0	0
Ruminococcus	0	0	0	3	0	0	0	0	0	7	0	0	0	0	0	0	0	0	0	0	0	9	0	0	11	0	0	0	0	0	0	0	1	7	0	0
Sarcina	0	0	0	0	0	0	0	0	0	0	0	0	0	0	0	0	0	0	0	0	0	0	0	1	0	0	0	0	0	0	0	0	0	0	0	0
Sediminibacterium	0	0	0	0	0	0	0	0	0	0	0	0	0	1	0	0	0	0	0	0	0	0	0	0	0	0	0	0	0	0	0	0	0	0	0	0
Serratia	0	0	0	0	0	0	0	0	0	0	0	0	0	0	0	0	0	0	0	0	0	0	0	0	0	0	0	0	0	0	0	0	0	11	0	0
Shewanella	0	0	0	0	0	0	0	0	0	0	0	0	0	0	0	0	0	0	0	0	0	0	0	0	0	0	0	0	0	0	1	0	0	0	0	0
Shinella	0	0	0	0	0	0	0	0	0	0	0	0	0	0	0	0	0	0	0	0	1	0	0	0	0	0	0	0	0	0	0	0	0	0	0	0
Slackia	0	0	0	0	0	0	0	0	0	0	0	0	0	0	0	0	0	0	0	1	0	0	0	0	0	0	0	0	0	0	0	0	0	0	0	0
Solobacterium	0	0	0	0	0	0	0	0	0	0	0	0	0	0	0	0	0	0	0	0	0	1	0	0	0	0	0	0	7	0	0	3	0	0	0	0
Spartobacteria_genera_incertae_sedis	0	0	0	0	0	0	0	0	0	0	0	0	0	0	0	0	0	0	0	0	0	0	0	0	0	0	2	0	0	0	0	0	0	0	0	0
Sphingobium	0	0	0	0	0	0	0	0	0	0	0	0	0	0	0	0	0	0	6	0	0	0	0	0	0	0	0	0	0	0	0	0	0	0	0	0
Sphingomonas	0	4	0	0	0	0	0	2	0	12	0	0	0	8	1	9	8	0	0	0	2	5	0	0	0	0	0	12	11	3750	0	0	0	3	0	0
Spirosoma	0	0	0	0	0	0	0	0	0	0	0	0	0	0	0	3	0	0	0	0	0	0	0	0	0	0	0	0	0	0	0	0	0	0	0	0
Staphylococcus	5	2992	0	32	6	16	0	113	0	108	0	0	2	245	178	28	10	111	253	5142	1767	78	0	402	417	1385	1151	194	653	271	251	476	56	370	0	3558
Stenotrophomonas	0	0	0	1	0	0	0	7	0	6	0	0	0	1	0	0	0	0	0	0	1	0	0	0	0	0	0	0	0	0	0	0	0	0	0	0
Streptobacillus	0	0	0	0	0	0	0	0	0	0	0	0	0	0	0	0	0	0	0	0	0	2	0	0	0	0	0	0	0	0	0	0	0	0	0	0
Streptococcus	82	3318	0	25	8	8272	0	2712	0	3570	0	0	1	5803	555	1663	474	0	66	2	21	1527	17	378	3	41	3	3806	459	17	11	766	2	22	13	16
Streptophyta	0	0	0	0	0	0	0	3	0	6	0	0	0	0	0	0	0	6	0	8	2	0	0	1	0	0	0	16	13	0	0	0	0	0	0	0
Subdoligranulum	0	0	0	0	0	8	0	2	0	0	0	0	0	0	0	0	0	0	0	0	0	0	0	0	1	0	0	0	0	0	0	0	0	0	0	0
TM7_genera_incertae_sedis	0	0	0	0	0	0	0	0	0	0	0	0	0	6	9	0	3	0	9	1	2	4	0	2	0	0	0	0	5	0	0	0	0	0	0	0
Tannerella	0	0	0	0	0	0	0	0	0	0	0	0	0	0	0	0	0	0	0	0	0	5	0	0	0	0	0	0	1	0	0	0	0	0	0	0
Thermomonas	0	0	0	0	0	0	0	0	0	0	0	0	0	0	0	0	0	0	6	0	0	0	0	0	0	0	0	0	0	0	0	0	0	0	0	0
Trichococcus	0	0	0	0	0	0	0	0	0	0	0	0	0	0	0	0	0	0	0	0	0	0	0	2	0	0	0	0	0	0	0	0	0	0	0	0
Turicella	0	0	0	0	0	0	0	0	0	0	0	0	0	0	0	0	0	0	0	0	0	0	0	0	0	0	0	17	0	0	0	0	0	0	0	0
Ureaplasma	0	0	0	0	0	0	0	0	0	0	0	0	2	0	0	0	0	0	0	0	0	0	0	0	0	0	0	0	0	0	0	0	0	0	0	0
Vagococcus	0	0	0	0	0	0	0	0	0	0	0	0	0	0	0	0	0	0	0	0	0	0	0	0	0	0	1	0	0	0	0	0	0	0	0	0
Varibaculum	142	0	0	0	2	21	0	82	0	7	0	0	0	0	0	1	58	0	689	0	1	0	6	22	31	0	0	0	0	10	0	0	19	0	52	0
Variovorax	0	0	0	0	0	1	0	0	0	0	0	0	0	8	0	4	0	0	0	0	0	2	0	1	0	0	0	0	0	1	0	0	0	0	0	0
Veillonella	0	0	0	0	0	0	0	67	0	78	0	0	1124	4	0	0	18	0	2	0	1	69	1	7	2	0	0	0	63	0	5	152	0	0	0	0
Vibrio	0	2	0	0	0	4	0	1	0	0	0	0	0	0	0	4	0	17	6	0	0	6	0	0	0	0	0	11	18	0	0	0	0	0	0	0
Weissella	0	0	0	2	0	0	0	0	0	0	0	0	0	0	0	0	0	0	0	0	0	0	0	0	0	0	0	0	0	0	0	0	0	0	0	0
Xanthomonas	0	0	0	0	0	0	0	0	0	0	0	0	0	2	0	0	0	14	0	0	0	0	0	0	0	4	0	22	0	0	0	0	0	0	0	0
Zimmermannella	0	0	0	0	10	0	0	0	0	0	0	0	0	0	0	2	0	0	0	0	0	0	0	0	0	0	0	16	12	0	0	0	0	26	0	13
Zymophilus	0	0	0	0	0	0	0	0	0	0	0	0	0	0	0	0	0	0	0	0	0	0	0	2	0	0	0	0	0	0	0	0	0	0	0	0
Month 2
HadVaginal	No	No	Yes	No	No	Yes	Yes	Yes	Yes	No	No	Yes	Yes	Yes	No	Yes	No	Yes	No	No	Yes	No	No	Yes	Yes	Yes	Yes	No	No	Yes	Yes	Yes	No	Yes	No	Yes
HadAnal	No	No	No	No	Yes	No	Yes	No	Yes	No	No	Yes	No	Yes	No	Yes	No	No	No	No	No	No	Yes	No	Yes	No	Yes	No	No	Yes	No	Yes	No	Yes	No	No
ReceivedOral	No	No	No	No	No	Yes	No	Yes	Yes	No	No	Yes	Yes	Yes	No	Yes	No	Yes	No	No	No	No	No	Yes	No	Yes	Yes	No	No	Yes	Yes	Yes	No	Yes	No	Yes
Total High-quality Seq	2872	10136	9987	14764	18749	28642	10845	8643	5144	8183	5211	12864	15533	7877	12543	13231	8482	2335	22204	16445	10542	11397	14628	11048	12937	15778	12379	10726	12060	11531	8426	7790	15662	12410	15170	62599
Abiotrophia	0	0	0	0	0	0	0	0	0	0	0	0	0	0	0	0	0	0	0	0	2	0	0	0	0	0	0	0	0	0	0	0	0	0	0	0
Acidaminococcus	0	0	0	0	0	0	0	0	0	0	0	0	0	0	0	0	0	0	0	0	1	0	0	0	0	0	0	0	0	0	0	0	0	0	0	0
Acidovorax	0	0	0	0	0	0	0	0	0	3	10	0	0	85	0	0	0	0	0	0	0	0	0	1	0	0	0	4	0	0	0	0	0	2	0	0
Acinetobacter	0	159	0	0	0	28	0	0	0	3	3	2	3	0	4	0	0	0	1	47	9	168	1	54	4	14	26	75	4	17	0	10	0	8	0	5
Actinobaculum	0	0	0	0	0	0	0	0	0	0	0	0	0	0	0	0	155	1	96	0	0	0	2	0	0	2	0	0	0	0	0	0	0	1	225	0
Actinomyces	0	14	3	0	3	18	22	0	0	10	0	0	1	20	1	0	0	6	16	4	7	0	24	27	26	0	10	2	0	0	5	89	218	0	9	338
Actinoplanes	0	0	0	0	0	13	1	0	0	0	0	0	0	0	0	0	0	0	0	0	0	0	0	0	0	0	0	0	0	0	0	0	0	0	0	0
Adlercreutzia	0	0	0	0	0	0	0	0	0	0	0	0	0	0	0	0	0	0	0	0	0	0	0	0	1	0	0	0	0	0	0	0	0	0	0	0
Aerococcus	1	1	0	0	0	0	0	0	0	0	0	0	95	0	0	0	0	0	0	0	1	0	0	0	2	0	0	0	0	0	0	0	0	0	0	0
Aeromicrobium	0	0	0	0	0	41	0	0	0	0	0	0	0	0	0	0	0	0	0	0	0	0	0	0	0	0	0	0	0	0	0	0	0	0	0	0
Aeromonas	0	6	0	0	0	0	0	0	0	0	0	0	0	0	0	0	0	0	0	0	0	0	0	0	0	0	1	0	0	0	0	0	0	0	0	0
Afipia	0	0	0	0	0	563	0	0	0	0	0	0	0	19	0	0	0	0	0	0	0	0	0	0	0	0	0	0	0	0	0	0	0	0	0	0
Akkermansia	0	0	0	0	0	0	0	0	0	0	0	0	0	0	0	0	0	0	0	0	0	0	0	0	2	0	0	0	0	0	0	0	0	0	0	0
Alkanindiges	0	0	0	0	0	13	0	0	0	0	0	0	0	0	0	0	0	0	0	0	0	0	0	0	0	0	0	0	0	0	0	0	0	0	0	0
Alloiococcus	0	0	0	0	0	0	0	0	0	0	0	0	0	0	0	0	0	0	0	0	0	0	0	0	2	0	0	0	0	0	0	0	0	0	0	0
Anaeroarcus	0	0	0	0	0	1	0	0	0	0	0	0	0	0	0	0	0	0	0	0	0	0	0	0	0	0	0	0	0	0	0	0	0	0	0	0
Anaerobiospirillum	0	0	0	0	0	0	0	0	0	0	0	0	0	0	0	0	0	0	0	0	0	0	0	0	0	0	1	0	0	0	0	0	0	0	0	0
Anaerococcus	0	989	619	25	168	124	3556	19	59	243	186	15	14	134	3812	38	1	70	96	1947	3554	813	644	906	2972	208	2315	0	1634	55	4365	75	2378	168	134	23198
Anaerosphaera	0	0	0	0	0	0	0	0	0	0	0	0	0	0	0	0	0	0	0	0	0	0	0	0	0	0	0	0	0	0	0	0	0	0	0	2
Anoxybacillus	0	0	0	0	0	0	0	0	0	0	0	0	0	0	0	0	0	0	0	0	0	0	0	0	0	0	0	78	0	0	0	0	0	9	0	0
Arthrobacter	0	15	0	0	0	0	4	9	0	0	6	0	0	0	0	0	0	0	0	1	0	0	0	4	0	0	0	3	0	0	0	22	0	0	0	0
Atopobium	45	0	0	0	5	0	0	0	0	0	0	0	1	0	0	0	0	0	21	0	0	0	0	0	1	0	0	0	0	0	0	0	0	0	0	0
Aurantimonas	0	0	0	0	0	349	0	0	0	0	0	0	0	0	0	1	0	0	0	0	0	6	0	0	0	0	0	0	0	0	0	0	0	35	0	0
Azomonas	0	0	0	0	0	0	0	0	0	0	0	0	0	0	0	0	0	0	0	0	0	0	0	0	0	0	0	0	0	1	0	0	0	0	0	0
Bacillariophyta	0	0	0	0	0	2204	2	0	0	0	0	0	0	0	0	0	3	1	0	0	0	0	0	0	0	0	0	0	0	0	0	0	0	0	0	0
Bacillus	0	0	0	0	0	31	0	0	0	0	0	0	0	0	0	1	0	0	0	0	0	0	0	0	0	0	0	14	0	0	2	0	0	0	0	0
Bacteroides	0	0	0	0	0	0	0	0	0	0	0	0	0	0	0	0	0	2	0	0	0	0	0	0	2	0	0	0	0	0	0	0	0	0	0	0
Bifidobacterium	9	0	0	0	1	0	4	0	0	0	1	0	0	0	118	0	0	6	0	0	0	1	0	6	22	0	0	0	6	0	1	0	20	8	1	0
Blautia	0	11	0	0	0	17	1	0	0	0	9	0	0	0	12	0	0	9	0	33	0	0	0	1	49	2	0	0	1	0	2	29	0	5	0	6
Bosea	0	0	0	0	0	31	0	0	0	0	0	0	0	0	0	0	0	0	0	0	0	0	0	9	0	0	0	0	0	0	0	0	0	0	0	2
Brachybacterium	0	0	0	0	0	0	0	0	0	4	1	2	0	0	0	0	0	0	0	1	1	34	1	0	2	0	0	0	0	5	0	0	0	0	0	0
Bradyrhizobium	0	0	0	0	0	0	0	0	0	0	0	0	0	6	0	0	0	0	0	0	0	0	0	0	0	0	0	0	0	0	0	0	0	0	0	0
Brevibacterium	0	0	0	0	0	0	4	0	41	96	19	8	0	0	53	27	0	34	0	0	1	65	2	17	4	32	5	32	0	0	0	0	7	42	4	428
Brevundimonas	0	4	5	0	0	47	0	0	0	206	5	5	0	0	0	0	0	1	0	1	0	9	1	10	0	0	10	0	0	0	0	0	0	0	0	1
Burkholderia	0	0	0	0	0	24	0	0	0	0	0	5	0	0	0	0	12	0	0	0	0	0	0	0	0	3	0	11	0	23	0	5	0	0	0	0
Butyricicoccus	0	27	0	0	0	0	0	0	0	0	0	0	0	0	0	0	0	0	0	2	0	0	0	0	0	0	0	0	0	0	0	0	0	0	0	0
Campylobacter	0	37	0	0	8	6	110	0	0	1	0	0	2	0	1	0	423	26	2852	14	10	1	2748	0	99	0	0	0	0	0	10	0	0	0	902	0
Capnocytophaga	0	1	0	0	0	0	0	0	0	0	0	0	0	0	0	0	0	0	0	0	15	1	0	1	0	0	0	0	0	0	0	0	0	0	0	14
Cardiobacterium	0	133	0	0	0	0	0	0	0	0	0	0	1	0	0	0	0	0	0	0	0	0	0	0	1	0	0	0	0	0	2	0	0	0	0	0
Carnobacterium	0	0	0	0	0	0	0	0	0	0	0	0	0	0	0	0	0	0	0	0	0	0	0	0	0	0	0	0	0	0	0	16	0	0	0	0
Catenibacterium	0	0	0	0	0	0	0	0	0	0	0	0	0	0	8	0	0	0	0	0	0	0	0	0	0	0	0	0	0	0	3	0	0	0	0	0
Caulobacter	0	0	0	0	0	41	0	3	0	0	0	0	0	0	0	0	0	0	0	0	0	0	0	0	0	0	0	0	0	0	0	1	0	0	0	0
Cellulomonas	0	0	0	0	0	6	0	0	0	0	0	0	0	0	0	0	0	0	0	0	0	0	0	0	0	1	0	0	0	0	0	0	0	0	0	0
Chitinophaga	0	0	0	1	0	0	0	0	0	0	0	0	0	0	0	0	0	0	0	0	0	0	0	0	0	0	0	0	0	0	0	0	0	0	0	0
Chryseobacterium	0	19	0	0	0	0	0	0	0	0	0	0	0	0	0	0	0	0	0	0	0	1	0	0	1	0	0	47	0	0	0	0	0	0	0	0
Citrobacter	0	12	0	0	0	0	10	0	0	8	1	0	1	0	0	8145	0	6	0	0	2	2	0	25	0	6	2	0	3	10	0	30	0	4	0	1
Clostridium	0	0	0	0	0	0	0	0	0	0	0	1	1	0	1	0	0	0	0	0	0	0	0	11	4	0	0	31	0	0	0	0	0	0	0	1
Collinsella	0	0	0	0	0	0	0	0	0	0	0	0	0	0	10	0	0	0	0	7	0	0	0	0	1	0	0	7	0	0	0	0	1	0	0	2
Comamonas	0	0	2	0	0	0	0	0	0	0	0	0	0	0	0	0	0	0	0	0	0	0	0	0	1	0	0	0	0	0	0	0	0	0	0	0
Conexibacter	0	0	0	0	0	0	0	0	0	0	0	0	0	0	0	0	0	0	0	0	0	0	0	0	0	0	0	0	0	0	0	6	0	0	0	0
Coprococcus	0	2	0	0	0	0	0	0	0	0	0	0	0	0	0	0	0	0	0	5	0	0	0	0	2	0	0	0	0	0	0	0	2	0	0	0
Corynebacterium	36	2442	1188	25	1	1292	915	38	3	756	163	184	53	1064	2348	761	2	106	28	9654	3581	2661	39	3694	3119	1846	4399	4072	4647	439	1961	3438	5250	1536	68	11323
Cupriavidus	0	0	0	0	0	0	0	0	0	0	0	0	0	0	0	0	0	3	0	0	0	0	0	0	0	2	0	0	0	0	0	0	0	0	0	0
Curtobacterium	0	0	0	0	0	20	0	0	0	0	0	0	0	0	0	0	0	0	0	0	0	0	0	31	0	0	0	0	0	0	0	0	0	0	0	2
Deinococcus	0	0	0	0	0	0	0	0	0	0	0	0	0	0	1	0	0	0	0	2	0	0	0	0	0	0	3	0	0	0	0	0	0	0	0	0
Dermabacter	0	0	1	0	0	0	0	0	0	21	0	9	0	34	0	14	0	12	0	71	18	48	2	215	0	219	26	33	137	0	23	32	0	27	0	218
Dermatophilus	0	0	0	0	0	0	0	0	0	0	0	0	0	0	0	0	0	0	0	0	0	0	0	0	0	3	0	0	0	0	0	0	0	0	0	0
Desemzia	0	0	0	0	0	0	0	0	0	0	0	0	0	0	0	0	0	0	0	0	1	0	0	0	0	0	0	0	0	0	0	0	0	0	0	0
Desulfomicrobium	0	18	0	0	0	0	0	0	0	0	0	0	0	0	0	0	0	0	0	0	0	0	0	0	0	0	0	0	0	0	0	0	0	0	0	0
Desulfotomaculum	0	0	0	0	0	0	0	0	0	0	0	0	0	0	0	0	0	0	0	0	0	0	0	0	0	0	0	7	0	0	0	0	0	0	0	0
Desulfovibrio	0	9	0	0	0	0	0	0	0	0	0	0	0	0	0	0	0	0	0	0	0	0	0	0	0	0	0	0	0	0	0	0	0	0	0	0
Devosia	0	0	0	0	0	119	0	0	0	0	0	0	0	0	0	0	0	0	0	1	0	0	0	8	1	0	0	8	0	0	0	0	0	0	0	2
Dialister	0	0	0	0	70	2	15	0	0	0	0	0	0	0	2	8	73	16	2516	0	4	0	703	1	16	0	0	0	0	0	0	0	0	5	125	14
Dolosigranulum	0	27	0	0	0	0	0	0	0	0	0	0	1	0	0	0	0	0	0	0	0	0	0	43	0	2	0	0	0	0	0	0	0	0	0	3
Dorea	0	6	0	0	0	0	0	0	0	0	0	0	0	9	1	0	0	0	0	10	0	0	0	0	11	0	0	0	0	0	0	0	6	0	0	0
Dyadobacter	0	0	0	0	0	5	0	0	0	0	0	0	0	0	0	0	0	0	0	0	0	0	0	0	0	0	0	0	0	0	0	0	0	0	0	0
Elizabethkingia	0	0	0	0	0	0	0	0	0	0	0	0	0	0	0	0	0	0	0	0	0	0	0	0	0	0	0	0	0	0	0	0	0	1	0	0
Emticicia	0	0	0	0	0	0	0	0	0	2	0	0	0	0	0	0	0	0	0	0	0	0	0	0	0	0	0	0	0	0	0	1	0	0	0	0
Enhydrobacter	0	0	0	0	0	45	0	0	0	145	5	1	0	0	0	0	0	0	0	0	2	15	0	0	0	0	4	376	0	0	0	0	0	7	0	1
Ensifer	0	0	0	0	0	7	0	0	0	0	0	0	0	0	0	0	0	0	0	0	0	0	0	0	0	0	0	0	0	0	0	0	0	0	0	0
Enterococcus	0	0	0	0	0	0	0	0	0	35	1	2	0	0	0	0	259	0	0	0	0	1	3	0	1	0	0	0	1	0	0	0	0	0	162	0
Eremococcus	0	0	0	0	0	14	0	0	0	0	0	0	0	0	0	0	0	0	0	1	0	0	0	1	0	0	0	0	1	0	0	0	0	0	0	7
Erwinia	0	0	0	0	0	0	0	0	0	0	0	0	0	0	0	0	0	0	0	0	0	0	0	0	0	0	0	1	0	0	0	0	0	0	0	0
Escherichia/Shigella	0	0	14	0	0	22	0	0	32	6	19	0	0	9	0	10	0	3	0	0	0	0	0	17	0	0	3	49	0	0	0	32	5	0	0	35
Ethanoligenens	0	0	0	0	0	0	0	0	0	0	0	0	0	0	0	0	0	0	0	0	0	0	0	0	0	5	0	14	0	0	0	0	0	0	0	0
Eubacterium	0	0	0	0	0	0	0	0	0	0	0	0	0	0	0	0	0	0	0	2	0	0	0	0	0	0	0	0	0	0	0	0	0	0	0	0
Facklamia	0	39	10	0	1	1	170	0	0	8	39	0	1	0	249	2	0	9	0	23	29	90	3	47	312	1	0	0	51	0	1	0	32	4	14	1636
Faecalibacterium	0	0	0	0	0	0	0	0	0	0	0	0	1	0	0	0	0	0	0	33	0	0	0	0	13	5	1	4	1	0	1	0	4	0	0	12
Fastidiosipila	0	0	0	0	0	0	67	0	0	0	1	0	1	0	28	0	0	0	59	5	19	3	0	7	54	0	0	0	0	0	0	0	34	0	1	137
Ferruginibacter	0	0	0	0	0	29	0	0	0	1	1	0	0	0	0	0	0	0	0	0	0	0	0	0	0	0	0	0	0	0	0	0	0	0	0	0
Finegoldia	6	11	77	0	22	47	1125	13	70	22	2	55	0	24	138	161	0	15	74	166	356	37	67	2335	561	109	287	0	0	2	468	68	326	58	18	1360
Flavobacterium	2	0	0	0	0	193	0	0	0	22	1	5	0	0	0	0	0	0	0	1	0	5	0	0	0	0	0	0	0	0	0	0	0	0	0	0
Fluviicola	0	0	0	0	0	0	2	0	0	0	0	0	0	0	0	0	0	0	0	0	0	0	0	0	0	0	0	0	0	0	0	0	0	0	0	0
Friedmanniella	0	0	0	0	0	20	0	0	0	0	0	0	0	0	0	0	0	0	0	2	0	0	0	0	0	0	0	0	0	0	0	0	0	0	0	0
Fusobacterium	0	49	0	0	0	0	0	0	0	2	0	0	0	0	0	0	35	0	0	0	18	2	3	0	0	0	0	0	0	0	1	0	0	0	40	0
Gardnerella	0	0	0	2209	385	4	25	5331	0	0	0	0	126	0	0	0	0	0	0	0	0	0	2	0	49	0	0	0	0	0	0	0	0	0	0	0
Gemella	11	0	449	0	0	0	0	16	0	0	125	4	0	0	0	9	0	12	0	1	8	3	1	52	23	0	0	0	1	0	0	0	0	0	0	4
Gemmatimonas	0	0	0	0	0	1	0	0	0	0	0	0	0	0	0	0	0	0	0	0	0	0	0	0	0	0	0	0	0	0	0	0	0	0	0	0
Geothrix	0	0	0	0	0	0	0	0	0	0	0	0	0	0	0	0	0	0	0	0	0	0	0	3	0	0	0	0	0	0	0	0	0	0	0	0
Globicatella	0	0	0	0	0	0	0	0	0	0	0	0	0	0	0	0	0	0	0	0	0	0	0	0	0	0	0	0	0	0	0	0	0	0	0	6
Gordonia	0	0	0	0	0	0	0	0	0	1	0	0	0	0	0	0	0	0	0	0	0	0	0	0	0	0	0	3	0	0	0	0	0	0	0	0
Gp3	0	0	0	0	0	0	0	0	0	3	1	0	0	0	0	0	0	0	0	0	0	0	0	0	0	0	0	0	0	0	0	0	0	0	0	0
Gp4	0	0	0	0	0	0	0	0	0	0	0	0	0	0	0	0	0	0	0	0	0	0	0	0	0	0	0	0	0	0	0	10	0	0	0	0
Gp6	0	2	0	0	0	17	0	0	0	0	0	0	0	0	0	0	0	0	0	0	2	0	0	0	0	0	0	1	0	0	0	0	0	0	0	0
Granulicatella	0	119	7	0	0	23	0	0	0	2	0	7	0	0	4	0	0	5	2	1	7	3	0	9	13	0	4	0	1	1	0	0	0	0	0	1
Haemophilus	0	0	0	0	0	7	0	0	0	0	0	0	0	0	0	0	0	0	0	0	0	0	0	0	0	0	0	0	0	0	0	0	0	0	0	0
Haliea	0	0	0	0	0	0	0	0	0	0	0	0	0	0	0	0	0	0	0	0	0	0	0	3	0	0	0	0	0	0	0	0	0	0	0	3
Hallella	0	0	0	0	0	0	0	0	0	0	0	0	0	0	0	0	0	0	0	0	0	0	3	0	0	0	0	0	0	0	0	0	0	0	0	0
Helcococcus	0	62	0	0	0	0	12	0	0	0	0	0	1	0	14	0	62	0	0	21	1	0	2	0	4	0	0	0	28	0	0	0	0	0	56	4
Herbaspirillum	0	0	0	0	0	0	0	0	0	0	0	0	0	0	0	5	0	0	0	0	0	0	0	0	0	0	0	0	0	0	0	0	0	0	0	0
Howardella	0	0	0	0	2	0	0	0	0	0	0	0	0	0	0	0	0	0	0	0	0	0	7	0	0	0	0	0	0	0	0	0	0	0	9	0
Hymenobacter	0	0	0	0	0	16	0	0	0	0	0	0	0	0	0	0	0	0	0	0	0	0	0	2	0	0	0	0	0	0	0	0	0	0	0	0
Hyphomicrobium	0	0	0	0	0	0	0	0	0	0	0	0	0	6	0	0	0	0	0	0	0	0	0	0	0	0	0	0	0	0	0	0	0	0	0	0
Iamia	0	0	0	0	0	0	0	0	0	0	0	0	0	0	0	0	0	0	0	0	0	0	0	2	0	0	0	0	0	0	0	0	0	0	0	0
Janibacter	0	0	0	0	0	0	1	0	0	1	0	0	0	0	0	0	0	0	0	0	0	2	0	0	0	0	0	0	0	0	0	0	0	0	0	0
Janthinobacterium	11	0	0	0	0	0	3	0	0	0	0	0	0	0	4	0	0	0	0	0	0	0	0	0	0	0	0	0	0	0	0	0	0	1	0	0
Jeotgalicoccus	0	30	0	0	0	0	3	0	0	0	0	8	1	0	6	0	0	0	0	7	1	6	0	13	128	0	0	0	0	0	0	0	0	0	0	2
Kineococcus	0	0	0	0	0	34	0	0	0	0	0	0	0	0	0	0	0	0	0	0	0	0	0	0	0	0	0	0	0	0	0	0	0	0	0	0
Kineosporia	0	0	0	0	0	54	0	0	0	0	0	0	0	0	0	0	0	0	0	0	0	0	0	0	0	0	0	0	0	0	0	0	0	0	0	0
Kingella	0	0	0	0	0	0	0	0	0	0	0	0	0	0	0	0	0	0	0	0	0	0	0	0	1	0	0	0	0	0	0	0	0	0	0	0
Klebsiella	0	0	0	0	0	1	0	0	0	3	2	0	0	0	0	0	0	0	0	0	0	126	0	1	0	238	69	0	43	0	0	0	0	206	0	0
Kocuria	0	0	0	0	0	0	0	0	0	6	0	0	0	4	1	0	0	0	0	3	2	32	0	8	0	13	0	18	0	0	0	8	0	0	0	1
Lactobacillus	0	15	0	8324	8203	370	0	0	0	3893	126	87	1162	0	0	0	0	0	0	5	1	44	31	16	15	0	0	64	0	0	0	0	0	0	0	2
Lactococcus	0	0	0	0	0	0	0	0	0	819	22	31	0	0	0	0	0	0	0	3	0	17	3	4	1	2	0	57	0	0	0	0	0	0	0	0
Leifsonia	0	0	0	0	0	40	0	0	0	0	0	0	0	0	0	0	0	0	0	0	0	0	0	0	0	0	0	0	0	0	0	0	0	0	0	0
Leptotrichia	0	0	0	0	0	0	0	0	0	0	0	0	0	0	0	0	0	0	0	0	9	0	0	0	1	0	0	0	0	0	0	0	0	0	0	0
Leuconostoc	0	0	0	0	0	31	0	0	0	0	0	0	0	0	0	0	0	0	0	1	0	0	0	11	0	0	0	0	0	0	0	0	0	1	0	1
Luteimonas	0	0	0	0	0	0	0	0	0	0	0	0	0	0	0	0	0	0	0	0	0	4	0	0	0	0	0	0	0	0	0	0	0	0	0	0
Luteolibacter	0	0	0	0	0	32	0	0	0	0	0	0	0	0	0	0	0	1	0	1	0	0	0	3	0	0	0	0	0	0	0	0	0	0	0	2
Mannheimia	0	0	0	0	0	1	0	0	0	0	0	0	0	0	0	0	0	0	0	0	1	0	0	0	0	0	0	0	0	0	0	1	0	0	0	0
Marinospirillum	0	0	0	0	0	2	0	0	0	0	0	0	0	0	0	0	0	0	0	0	0	0	0	0	0	0	0	0	0	0	0	0	0	0	0	0
Marmoricola	0	0	0	0	0	4	0	0	0	0	0	0	0	0	0	0	0	0	0	0	0	0	0	2	0	0	0	0	0	0	0	0	0	0	0	0
Massilia	0	0	0	0	0	467	0	0	0	0	0	0	0	0	0	0	1	0	0	0	0	3	0	1	0	0	0	0	0	0	0	0	0	0	0	0
Megamonas	0	0	0	0	0	0	0	0	0	0	0	0	0	0	0	0	0	0	0	1	0	0	0	0	0	0	0	0	0	0	0	0	0	0	0	0
Megasphaera	0	0	0	0	0	0	0	0	0	0	0	0	0	0	0	0	0	0	0	0	0	0	1	0	0	0	0	22	0	0	0	0	0	0	0	0
Meiothermus	0	0	0	0	0	3	0	0	0	0	0	0	0	0	0	0	0	0	0	0	0	0	0	0	0	0	0	0	0	0	0	0	0	0	0	0
Mesorhizobium	0	0	0	0	0	0	0	0	0	0	0	0	0	23	0	0	0	0	0	0	0	0	0	0	0	0	0	0	0	0	0	0	0	0	0	0
Methylibium	0	0	0	0	0	544	0	0	0	0	0	0	0	0	0	0	0	0	0	1	0	0	0	0	0	1	0	12	0	0	0	0	0	0	0	0
Methylobacterium	0	0	7	0	0	145	22	0	0	76	3	2	0	84	835	0	1	11	0	2	7	93	3	63	0	0	4	0	1	13	2	34	0	9	0	14
Methylophilus	0	0	0	0	0	257	0	0	0	0	0	0	0	0	0	0	0	0	0	0	0	0	0	0	0	0	0	0	0	0	0	0	0	0	0	0
Microbacterium	0	12	0	0	0	28	0	0	0	9	1	0	0	0	0	0	0	0	0	0	1	0	0	0	2	0	0	20	0	0	0	0	0	0	0	0
Micrococcus	0	0	0	0	0	0	8	32	0	123	2	2	0	30	2	1	0	0	0	1	2	19	1	6	15	0	13	11	0	0	0	19	0	45	1	37
Microlunatus	0	0	0	0	0	0	0	0	0	0	0	0	0	0	0	0	0	0	0	0	0	0	0	3	0	1	0	0	0	0	0	0	0	0	0	0
Mobiluncus	0	0	0	0	0	0	0	0	0	0	0	0	0	0	2	0	535	1	300	0	0	0	35	17	1	0	0	0	0	0	0	0	73	0	379	1
Modestobacter	0	0	0	0	0	0	0	7	0	0	3	0	0	0	0	0	0	0	0	0	0	0	0	0	0	0	0	0	0	0	0	0	0	0	0	0
Mogibacterium	0	0	0	0	0	32	0	0	0	0	0	0	0	0	0	0	0	0	0	0	0	0	0	0	0	0	0	0	0	0	0	0	0	0	0	0
Moraxella	0	12	0	0	0	0	0	0	0	1	0	1	0	0	0	0	0	0	0	0	1	0	0	27	0	0	0	0	0	0	0	0	0	0	0	3
Moryella	0	0	0	0	1	0	0	0	0	0	0	0	0	0	0	0	0	0	0	0	0	0	27	0	0	0	0	0	0	0	0	0	0	0	1	0
Mucilaginibacter	0	0	0	0	0	13	0	0	0	0	0	0	0	0	0	0	0	0	0	0	0	0	0	0	0	0	0	0	0	0	0	0	0	0	0	0
Mycobacterium	0	0	0	0	0	0	0	0	0	0	0	0	0	0	0	0	0	0	0	0	0	0	0	0	0	0	0	4	0	0	0	0	0	0	0	0
Mycoplasma	0	0	0	0	0	0	0	0	0	0	0	0	0	66	0	0	0	0	0	0	0	0	0	0	0	0	0	0	0	0	0	0	0	0	0	0
Nakamurella	0	0	0	0	0	38	0	0	0	0	0	0	0	0	0	0	0	0	0	0	0	0	0	0	0	0	0	0	0	0	0	0	0	0	0	0
Neisseria	0	102	0	0	0	0	0	0	0	14	1	0	0	0	0	2	0	0	1	1	146	15	0	15	7	0	0	0	1	0	0	0	0	0	0	1
Nesterenkonia	0	0	0	1	0	0	0	0	0	0	0	0	0	0	0	0	0	0	0	0	0	0	0	0	0	0	0	0	0	0	0	0	0	0	0	0
Nocardioides	0	0	0	0	0	77	0	0	0	0	0	0	0	0	0	0	0	0	0	0	0	0	0	2	0	0	0	0	0	0	0	23	0	0	0	0
Nocardiopsis	0	0	0	0	0	0	0	0	0	0	0	0	0	0	0	0	0	0	0	1	0	0	0	0	0	0	0	0	0	0	0	0	0	0	0	0
Nosocomiicoccus	0	0	0	0	0	0	0	0	0	0	0	0	0	0	0	0	0	0	0	0	0	10	0	0	12	0	1	0	0	0	0	0	0	0	0	0
Novosphingobium	0	0	0	0	0	779	0	0	0	0	1	0	0	15	0	0	0	1	0	0	0	0	0	0	0	0	0	0	0	0	0	0	0	0	0	0
Oerskovia	0	0	0	0	0	2	0	0	0	0	0	0	0	0	0	0	0	0	0	0	0	0	0	0	0	0	0	0	0	0	0	0	0	0	0	0
Oligella	0	0	0	0	0	0	0	0	0	0	0	1	0	0	0	0	0	3	0	0	0	0	0	0	0	2	0	0	0	0	0	0	0	0	0	16
Olsenella	0	0	0	0	0	0	0	0	0	0	0	0	0	0	0	0	0	0	0	0	0	0	19	0	0	0	0	0	0	0	0	0	0	0	2	0
Oribacterium	0	0	0	0	0	0	0	0	0	0	0	0	0	0	0	0	0	0	0	0	0	0	0	0	1	0	0	0	0	0	0	41	0	0	0	0
Oscillibacter	0	0	0	0	0	0	0	0	0	0	0	0	0	0	0	0	0	0	0	2	0	0	0	0	5	0	0	0	0	0	0	0	0	0	0	0
Paludibacter	0	0	0	0	0	0	0	0	0	0	0	0	0	0	0	0	0	0	0	0	0	0	0	0	0	0	0	0	0	1	0	0	0	0	0	0
Pantoea	0	1	0	0	0	0	0	0	0	0	0	0	0	0	0	0	0	0	0	1	0	0	0	0	0	0	0	4	0	0	0	0	0	0	0	0
Paracoccus	0	0	0	0	0	61	0	0	0	98	2	4	0	0	0	0	0	0	0	0	1	3	2	2	0	0	11	71	0	14	0	0	0	3	0	9
Paraprevotella	0	0	0	0	0	0	0	0	0	0	0	0	0	0	0	0	0	0	0	0	0	0	0	0	0	0	0	0	1	0	0	0	0	0	0	0
Parvimonas	0	0	0	0	0	0	0	0	0	0	22	1	0	0	0	0	0	3	370	1	0	0	2	8	0	0	0	0	0	0	0	0	0	0	0	2
Patulibacter	0	0	0	0	0	0	0	0	0	7	0	0	0	0	0	0	0	0	0	0	0	0	0	0	0	0	0	0	0	0	0	0	0	0	0	0
Pedobacter	0	2	0	0	0	507	0	0	0	0	0	0	0	0	0	0	0	0	0	0	0	0	0	6	1	0	0	0	0	0	0	0	0	0	0	0
Pelomonas	6	0	0	0	0	9	0	0	0	0	0	0	0	0	0	1	13	4	0	1	0	0	0	0	1	0	0	0	0	0	0	0	0	6	0	0
Peptococcus	0	0	0	0	3	0	0	0	0	1	0	0	0	0	0	0	0	0	0	1	0	0	6	0	3	0	0	0	0	0	0	0	4	11	3	0
Peptoniphilus	262	1	54	0	55	81	1246	0	65	31	42	4	5	0	569	5	408	30	1867	233	481	37	430	275	889	5	363	19	3	0	373	0	1126	27	405	7233
Peptostreptococcus	0	0	0	0	0	0	0	0	0	1	3	0	0	0	0	0	0	2	0	0	0	4	0	0	0	0	0	0	0	0	0	0	0	0	0	0
Phascolarctobacterium	0	0	0	0	0	0	0	0	0	0	0	0	0	0	0	0	0	0	0	3	0	0	0	0	0	0	0	0	0	0	0	0	0	0	0	0
Phenylobacterium	0	0	0	0	0	41	0	0	0	0	0	0	0	0	0	0	0	0	0	0	0	0	0	0	0	0	0	0	0	0	0	0	0	0	0	0
Phocoenobacter	0	0	0	0	0	0	0	0	0	0	0	0	0	0	0	0	0	0	0	0	0	0	0	0	1	0	0	0	0	0	0	0	0	0	0	0
Planococcus	0	0	0	0	0	0	0	0	0	0	0	0	0	0	0	0	3	0	0	0	0	0	0	0	0	0	0	0	0	0	0	0	0	0	0	0
Polaromonas	0	0	0	0	0	0	0	0	0	0	0	0	0	0	0	0	0	0	0	0	0	0	0	3	0	0	0	0	0	0	0	0	0	0	0	0
Porphyromonas	0	22	0	0	44	23	522	0	0	3	0	0	1	5	20	0	112	13	1148	2	62	0	1613	1	825	1	2	0	0	2	50	0	1193	2	388	14
Prauserella	0	0	0	0	0	0	0	0	0	0	0	0	0	0	0	0	0	0	0	1	0	0	0	0	0	0	0	0	0	0	0	0	0	0	0	0
Prevotella	2	0	0	0	1062	46	28	0	0	0	8	1	0	0	1	0	1024	34	3523	6	4	0	1759	8	52	0	0	2	0	0	5	0	30	3	1493	6
Propionibacterium	149	49	4	0	0	259	99	370	163	43	460	30	12	50	7	21	97	63	8	337	20	23	1	47	3	110	17	323	13	73	12	365	3	68	0	77
Propionigenium	0	0	0	0	0	0	0	0	0	0	0	0	0	0	0	0	0	0	0	0	0	1	0	0	0	0	0	0	0	0	0	0	0	0	0	0
Propionimicrobium	15	0	0	0	1	0	16	0	0	0	0	1	0	0	0	0	540	3	233	0	0	0	22	0	9	0	0	0	0	0	3	0	5	2	2210	5
Proteocatella	0	17	0	0	0	0	0	0	0	0	0	0	1	0	0	0	0	0	0	0	0	0	0	0	0	0	0	0	0	0	0	0	0	0	0	0
Pseudolabrys	0	0	0	0	0	16	0	0	0	0	0	0	0	0	0	0	0	0	0	0	0	0	0	0	0	0	0	0	0	0	0	0	0	0	0	0
Pseudomonas	20	92	0	0	0	59	0	0	0	2	120	8	1	17	2	14	0	2	0	10	0	14	1	13	3	3	20	17	11	14	0	8	0	0	0	2
Pseudonocardia	0	0	0	0	0	0	0	0	0	0	0	0	0	0	0	0	0	0	0	5	0	0	0	0	0	0	0	0	0	0	0	0	0	0	0	0
Pseudorhodoferax	0	0	0	0	0	15	0	0	0	0	0	0	0	0	0	0	0	0	0	0	0	0	0	0	0	0	0	0	0	0	0	0	0	0	0	0
Pseudoxanthomonas	16	0	0	0	0	0	0	0	0	0	0	0	0	0	0	0	0	0	0	0	0	0	0	0	0	0	0	0	0	0	0	0	0	0	0	0
Psychrobacter	0	0	0	0	0	0	0	0	0	1	0	0	0	0	3	0	0	0	0	10	6	1	0	10	0	0	0	3	0	0	0	260	0	0	0	0
Pyramidobacter	0	0	0	0	0	0	0	0	0	0	0	0	0	0	0	0	0	0	0	0	0	0	23	0	1	0	0	0	0	0	0	0	0	0	0	0
Ralstonia	1815	469	326	55	0	5233	330	2539	3917	299	2092	268	73	545	565	348	1283	612	27	86	21	187	15	592	26	240	72	2148	102	1596	37	1947	42	349	7	556
Rheinheimera	0	0	0	0	0	0	0	0	0	0	0	0	0	3	0	0	0	0	0	0	0	0	0	0	0	0	2	0	0	0	0	0	0	0	0	0
Rhizobium	0	0	0	0	0	397	0	0	1	0	0	0	0	0	0	3	0	0	0	0	0	2	0	0	0	0	1	0	0	0	0	0	0	0	0	0
Rhodobacter	0	0	0	0	0	0	0	0	0	0	0	0	0	0	0	0	0	0	0	1	0	0	0	0	0	0	0	17	0	0	0	0	0	0	0	0
Rhodopseudomonas	0	0	0	0	0	40	0	0	0	0	0	0	0	0	0	0	0	0	0	0	0	0	0	0	0	0	0	0	0	0	0	0	0	0	0	0
Roseateles	8	0	0	0	0	0	12	0	0	0	0	0	0	0	0	0	0	0	0	0	0	0	0	0	0	4	0	0	0	0	0	0	0	0	0	0
Roseburia	0	0	0	0	0	1	0	0	0	0	0	0	0	0	0	0	0	0	0	1	0	0	0	0	1	0	0	0	0	0	0	0	0	0	0	0
Roseomonas	0	0	0	0	0	0	0	0	0	0	0	0	0	0	0	0	0	0	0	1	0	0	0	0	0	0	0	0	0	0	0	0	0	0	0	0
Rothia	0	0	4	0	0	319	0	0	0	11	0	1	0	13	6	39	0	6	0	1	1	2	0	20	6	0	0	0	3	32	0	26	1	4	0	1
Rubellimicrobium	0	0	0	0	0	0	0	0	0	0	0	0	0	0	0	0	0	0	0	9	0	0	0	2	0	0	0	0	0	0	0	0	0	0	0	0
Ruminococcus	0	0	0	0	0	0	0	0	0	0	0	0	0	0	0	0	0	0	0	7	0	0	0	0	14	0	0	0	0	0	0	0	8	0	0	0
Salinibacterium	0	0	0	0	0	10	0	0	0	0	0	0	0	0	0	0	0	0	0	0	0	0	0	0	0	0	0	0	0	0	0	0	0	0	0	0
Salinicoccus	0	15	0	0	0	0	0	0	0	0	0	0	0	0	0	0	0	0	0	0	0	0	0	0	1	0	0	0	0	0	0	0	0	0	0	0
Sarcina	0	0	0	0	0	0	0	0	0	0	0	0	0	0	0	0	0	0	0	0	0	0	0	0	1	0	0	0	0	0	0	0	0	0	0	0
Schlegelella	0	0	0	0	0	762	0	0	0	0	0	0	0	0	0	0	0	2	0	0	0	0	0	0	0	0	0	0	0	0	0	0	0	0	0	0
Selenomonas	0	0	0	0	0	0	0	0	0	0	0	0	0	0	0	0	0	0	0	0	0	0	0	0	2	0	0	0	0	0	0	0	0	0	0	0
Serratia	0	0	0	0	0	0	0	23	49	0	39	2	0	8	0	0	0	0	0	0	2	0	0	1	0	0	0	12	0	141	0	11	0	8	0	0
Sneathia	0	0	0	0	329	0	0	0	0	0	0	0	0	0	0	0	0	0	0	0	0	0	1	0	0	0	0	0	0	0	0	0	0	0	0	0
Sphingobium	0	0	0	0	0	513	0	0	0	0	0	0	0	0	0	0	0	0	0	0	0	0	0	0	0	0	0	0	0	0	0	0	0	0	0	0
Sphingomonas	11	6	0	1	0	159	0	0	0	167	44	8	0	542	69	4	0	1	0	0	4	15	1	28	0	5	0	12	0	16	0	6	0	0	0	3
Sphingopyxis	0	0	0	0	0	0	0	0	0	0	0	0	0	0	0	0	0	0	0	0	0	0	0	0	0	0	0	0	4	0	0	0	0	0	0	0
Staphylococcus	54	772	4150	40	0	317	468	42	475	118	757	8730	32	1960	387	85	55	841	49	2029	978	152	14	1169	1149	508	500	362	1194	8790	182	245	16	280	69	12791
Stenotrophomonas	0	0	0	0	0	0	0	0	0	0	0	0	0	0	13	0	0	0	0	0	1	3	0	2	0	0	8	0	0	20	0	0	0	0	0	2
Steroidobacter	0	0	0	0	0	0	0	0	0	0	0	0	0	0	0	0	0	0	0	1	0	0	0	6	0	0	0	0	0	0	0	0	0	0	0	1
Streptococcus	21	2119	2761	0	74	131	25	55	71	108	557	2925	20	2755	704	4	90	150	50	22	58	14	12	594	120	9	5	91	28	61	15	130	5	8	10	98
Streptophyta	9	0	0	0	0	1042	1	0	0	0	15	1	0	0	0	0	1	2	1	13	0	0	3	22	0	0	0	78	0	0	0	13	0	61	0	2
Subdivision3_genera_incertae_sedis	0	0	0	0	0	0	0	0	0	0	0	0	0	0	0	0	0	0	0	0	0	0	0	0	0	2	0	0	0	0	0	0	0	0	0	0
Subdoligranulum	0	0	0	0	0	0	0	35	0	0	0	0	0	0	3	0	0	1	0	7	1	0	0	0	0	0	0	0	0	0	0	0	0	0	0	0
Sutterella	0	0	0	0	0	0	0	0	0	0	0	0	0	0	0	0	0	0	0	0	0	0	1	0	0	0	0	0	0	0	0	0	0	0	0	0
TM7_genera_incertae_sedis	0	4	0	0	0	16	2	0	0	0	0	0	0	0	0	0	0	0	0	0	3	0	0	0	0	0	0	24	0	0	0	3	0	0	0	0
Tannerella	0	7	0	0	0	0	0	0	0	0	0	0	0	0	0	0	0	0	0	0	0	0	0	0	0	0	0	0	0	0	0	0	0	0	0	0
Tumebacillus	0	0	0	0	0	0	0	0	0	0	0	0	0	0	0	0	0	0	0	0	0	0	0	0	0	0	0	3	0	0	0	0	0	0	0	0
Varibaculum	44	0	0	0	1	0	21	0	0	0	0	0	0	0	58	0	25	1	417	1	0	0	5	0	13	0	0	0	0	0	0	0	86	0	163	0
Variovorax	0	0	0	0	0	111	0	0	0	0	0	0	0	0	0	0	0	0	0	0	0	0	0	0	0	0	0	0	5	0	0	0	0	0	0	0
Veillonella	1	39	44	0	385	81	0	3	0	2	0	283	2137	0	0	7	0	0	0	0	10	1	11	20	11	14	1	8	2	1	8	2	0	0	2	1
Verrucomicrobium	0	0	0	0	0	0	0	0	0	0	0	0	0	0	0	0	0	0	0	0	0	0	0	0	1	0	0	0	0	0	0	0	0	0	0	0
Vibrio	0	25	0	0	0	0	0	0	40	10	0	0	0	0	2	0	0	0	0	0	0	1	0	3	0	0	0	0	0	0	0	0	0	0	0	0
Weissella	0	0	0	0	0	42	0	0	0	0	0	0	0	0	0	0	0	0	0	0	0	0	0	0	0	0	0	0	0	0	0	0	0	3	0	0
Xanthomonas	0	2	0	0	0	0	0	0	0	0	0	0	0	0	0	0	0	0	0	2	0	0	0	0	0	0	0	0	0	0	0	0	0	0	0	0
Zimmermannella	0	0	0	0	0	1	0	0	14	150	7	7	0	0	20	8	0	5	0	0	0	1	2	1	0	8	0	2071	24	0	0	0	5	26	0	20
Zoogloea	0	0	0	0	0	7	0	0	0	0	0	0	0	0	0	0	0	0	0	0	0	0	0	0	0	0	0	0	0	0	0	0	0	0	0	0
Month 3
HadVaginal	No	No	Yes	Yes	No	Yes	Yes	Yes	Yes	No	No	Yes	Yes	Yes	Yes	Yes	No	Yes	No	No	Yes	Yes	No	Yes	Yes	Yes	Yes	No	No	Yes	Yes	Yes	Yes	Yes	No	Yes
HadAnal	No	No	No	No	Yes	No	Yes	No	Yes	No	No	Yes	No	Yes	No	Yes	No	No	No	No	No	No	Yes	No	Yes	No	Yes	No	No	Yes	No	Yes	No	Yes	No	No
ReceivedOral	No	No	No	Yes	Yes	Yes	No	Yes	Yes	No	No	Yes	Yes	Yes	No	Yes	No	Yes	No	No	No	Yes	Yes	Yes	No	Yes	Yes	No	No	Yes	Yes	Yes	No	Yes	No	Yes
Total High-quality Seq	13353	7356	N/A	12137	14048	5075	2840	3329	7979	N/A	7854	5568	8070	3288	N/A	8774	16675	7517	8357	23221	N/A	4273	14000	11111	9699	6521	7498	2549	5560	6859	13276	9876	8008	6482	18612	7190
Acidovorax	0	20	0	1	1	9	0	0	0	0	0	0	0	0	0	0	0	0	2	0	0	0	0	0	0	1	0	0	0	0	0	0	0	0	0	0
Acinetobacter	0	17	0	1	0	30	104	412	5	0	9	137	0	0	0	0	0	0	25	6	0	19	0	43	0	47	10	0	235	14	0	42	3	134	1	0
Actinobaculum	226	0	0	0	0	0	0	0	0	0	0	0	0	0	0	0	393	0	44	0	0	0	0	0	0	0	0	0	0	0	0	0	0	0	170	0
Actinomyces	6	0	0	0	1	0	0	0	0	0	0	0	0	0	0	4	2	23	19	0	0	0	63	0	9	0	0	0	18	0	15	15	6	0	0	85
Aerococcus	0	0	0	0	0	0	0	0	39	0	0	0	945	0	0	0	3	0	0	1	0	0	0	0	7	6	0	0	1	0	1	0	0	0	0	0
Aeromonas	0	0	0	0	0	0	0	0	0	0	0	0	0	0	0	0	0	0	0	0	0	0	0	0	0	8	0	0	0	0	0	2	0	0	0	0
Allisonella	0	0	0	0	0	0	0	0	0	0	0	0	0	0	0	0	0	0	0	0	0	3	0	0	0	0	0	0	0	0	0	0	0	0	0	0
Alloiococcus	0	0	0	0	0	0	0	0	0	0	0	0	0	0	0	0	0	0	0	0	0	0	0	0	2	0	0	0	0	0	0	0	0	0	0	0
Anaerococcus	76	393	0	11	36	0	0	1	49	0	6	0	0	0	0	139	3	202	186	5558	0	484	1476	2034	755	187	188	0	184	0	6490	3160	1166	496	2	205
Anaerosphaera	0	0	0	0	0	0	0	0	0	0	0	0	0	0	0	0	1	0	0	0	0	0	0	0	0	0	0	0	0	0	0	0	0	0	0	0
Arthrobacter	0	6	0	0	0	0	0	4	2	0	25	0	0	72	0	6	0	0	4	0	0	0	0	0	0	0	15	0	8	0	0	2	3	0	0	1
Asticcacaulis	0	0	0	0	0	0	0	0	0	0	0	0	0	0	0	0	0	0	1	0	0	0	0	0	0	0	1	0	0	0	0	0	0	0	0	0
Atopobium	5	0	0	0	0	0	0	0	56	0	0	0	0	0	0	0	0	0	25	0	0	0	9	0	0	0	0	0	0	0	2	0	0	0	0	0
Bacillariophyta	0	0	0	0	0	0	0	0	0	0	0	0	0	0	0	8	0	0	5	0	0	0	0	0	0	0	0	0	0	0	0	1	2	0	0	4
Bacillus	0	0	0	0	0	0	37	13	0	0	0	0	0	0	0	0	0	0	0	0	0	0	0	69	0	0	0	0	0	0	0	0	1	0	0	0
Bdellovibrio	0	0	0	0	0	0	0	0	0	0	0	0	0	0	0	0	0	5	0	0	0	0	0	0	0	0	0	0	0	0	0	0	0	0	0	0
Bifidobacterium	0	0	0	0	0	0	0	0	0	0	0	0	0	0	0	0	7	0	0	0	0	8	0	0	6	0	0	0	0	0	0	1	5	0	2	0
Blautia	0	0	0	0	0	0	0	0	0	0	0	0	0	0	0	0	0	0	0	1	0	0	0	0	0	6	0	0	0	0	0	0	4	0	0	0
Bosea	0	0	0	0	0	0	0	0	0	0	0	0	0	0	0	0	0	0	0	0	0	10	0	0	0	0	0	0	0	0	1	0	0	0	0	0
Brachybacterium	0	0	0	0	3	0	0	0	0	0	0	0	0	0	0	0	0	0	0	0	0	0	1	0	0	3	0	0	0	0	2	0	6	0	0	0
Brevibacterium	0	0	0	1	4	0	0	0	0	0	0	0	0	0	0	0	0	0	0	0	0	26	1	0	9	112	0	0	12	0	1	3	1	35	0	8
Brevundimonas	0	0	0	0	0	0	0	0	0	0	11	0	0	0	0	16	0	0	0	0	0	0	0	0	0	0	13	2	0	6	0	0	0	35	0	0
Brucella	0	0	0	0	0	0	0	0	0	0	0	0	0	0	0	0	0	0	0	0	0	5	0	0	0	0	0	0	0	0	0	0	0	0	0	0
Burkholderia	0	0	0	1	0	2	0	0	2	0	7	0	0	0	0	0	0	0	0	0	0	1	0	10	0	3	8	6	24	1	0	2	0	0	0	0
Caedibacter	0	0	0	0	2	0	0	0	0	0	0	0	0	0	0	0	0	0	0	0	0	0	0	0	0	0	0	0	0	0	1	0	0	0	0	0
Caldilinea	0	0	0	0	0	0	0	0	0	0	0	0	2	0	0	0	0	0	0	0	0	0	0	0	0	0	0	0	0	0	0	0	0	0	0	0
Campylobacter	560	0	0	0	2	0	0	0	2	0	0	0	0	0	0	9	458	0	55	277	0	0	130	0	378	0	0	0	0	1	1	0	0	0	1988	1
Capnocytophaga	0	0	0	0	0	0	0	0	0	0	0	0	0	0	0	0	0	0	0	0	0	0	0	0	1	0	0	0	0	0	1	0	0	0	0	0
Caulobacter	0	0	0	0	0	0	0	0	0	0	0	0	0	0	0	0	0	0	0	0	0	2	0	0	0	0	0	0	0	0	0	0	0	0	0	0
Cellvibrio	0	0	0	0	0	0	0	0	0	0	0	0	0	0	0	0	0	0	1	0	0	4	0	0	0	0	0	2	0	0	0	0	0	0	0	0
Chitinibacter	0	0	0	0	0	0	0	0	0	0	4	0	0	0	0	0	0	0	0	0	0	0	0	0	0	0	0	0	0	0	0	0	0	18	0	0
Chitinophaga	0	0	0	0	0	0	0	0	0	0	0	0	0	0	0	0	0	3	0	0	0	0	0	0	0	0	0	0	0	0	0	0	0	0	0	0
Chryseobacterium	0	0	0	0	0	1	0	0	2	0	0	21	0	16	0	5	0	0	1	0	0	3	0	6	0	4	0	3	5	2	0	2	0	13	0	1
Citrobacter	0	0	0	0	0	0	0	0	0	0	0	0	0	0	0	50	0	0	0	0	0	0	0	0	0	0	0	5	0	9	0	2	0	0	0	4
Cloacibacterium	0	0	0	0	0	0	0	0	0	0	0	2	0	0	0	0	0	0	0	0	0	0	0	0	0	0	0	0	0	0	0	0	0	0	0	0
Clostridium	0	0	0	0	0	7	0	0	1	0	0	0	0	0	0	0	0	0	0	0	0	0	0	0	0	0	0	0	0	0	0	0	0	0	0	0
Collinsella	0	0	0	0	0	0	0	0	0	0	0	0	0	0	0	0	0	0	0	0	0	6	0	0	0	0	0	0	0	0	0	0	0	0	0	0
Comamonas	0	0	0	0	0	7	0	0	0	0	0	0	0	0	0	0	0	0	0	0	0	0	0	0	0	0	0	0	0	0	1	1	0	0	0	0
Coprobacillus	0	0	0	0	0	0	0	0	0	0	0	0	0	0	0	0	0	0	0	0	0	0	0	0	0	0	0	0	0	0	3	0	0	0	0	0
Corynebacterium	0	335	0	21	107	251	422	0	73	0	22	3	1	13	0	180	3	173	65	7290	0	2210	111	1792	1938	3012	3681	111	360	138	2277	1139	2147	1455	0	1707
Cryobacterium	0	0	0	0	0	0	0	0	0	0	0	0	0	0	0	0	0	0	0	0	0	1	0	0	0	0	0	0	0	0	0	0	0	0	0	0
Defluvibacter	0	0	0	0	0	0	0	0	0	0	0	0	0	0	0	0	0	0	0	0	0	2	0	0	0	0	0	0	0	0	0	0	0	0	0	0
Deinococcus	0	0	0	0	0	0	0	0	0	0	0	0	0	0	0	13	0	0	0	0	0	0	0	0	0	0	0	0	0	0	0	0	0	0	0	0
Delftia	0	5	0	1	1	0	0	0	0	0	43	113	0	69	0	0	0	0	3	0	0	3	0	0	2	0	0	0	8	0	0	1	1	1	1	1
Dermabacter	0	0	0	0	1	0	0	0	7	0	0	115	0	0	0	0	0	0	0	54	0	27	2	56	10	115	129	5	1	0	24	63	6	0	0	4
Desemzia	0	0	0	0	0	0	0	0	0	0	0	0	0	0	0	0	0	0	0	0	0	0	0	0	0	0	0	0	18	0	0	5	0	0	0	0
Devosia	0	0	0	0	0	0	0	0	0	0	0	0	0	0	0	25	0	0	0	0	0	0	0	0	0	0	0	0	0	0	0	0	0	0	0	0
Dialister	2338	0	0	1	9	0	0	0	25	0	0	0	0	0	0	0	104	0	1151	14	0	1	469	0	225	0	12	3	0	0	0	0	4	0	507	0
Dolosigranulum	0	0	0	0	0	0	0	0	0	0	18	0	0	0	0	15	0	0	0	0	0	0	0	0	0	0	0	0	0	0	0	0	0	0	0	0
Dorea	0	0	0	0	0	0	0	0	0	0	0	0	0	0	0	0	0	0	0	2	0	3	0	0	1	0	0	0	0	0	0	0	0	0	0	0
Duganella	0	0	0	0	0	0	0	0	0	0	0	0	0	0	0	0	0	0	0	0	0	0	0	0	0	0	0	0	0	0	0	1	0	0	0	0
Enhydrobacter	0	0	0	0	0	0	0	0	0	0	0	0	0	0	0	0	0	0	0	0	0	0	0	0	0	0	0	0	0	0	0	0	1	0	0	0
Enterococcus	0	0	0	0	0	0	0	0	0	0	0	0	0	0	0	0	74	0	0	0	0	0	1	0	2	0	0	0	0	0	0	0	0	0	25	0
Eremococcus	0	0	0	0	0	0	0	0	0	0	0	0	0	0	0	0	0	0	0	11	0	0	1	0	0	0	0	0	0	0	0	1	0	0	0	12
Escherichia/Shigella	0	7	0	0	0	0	6	1	0	0	4	0	0	3	0	5	1	12	0	0	0	1	0	50	1	8	2	4	17	5	1	2	3	0	1	0
Exiguobacterium	0	0	0	0	0	0	52	0	0	0	0	0	0	40	0	0	0	0	0	0	0	0	0	0	0	0	0	0	0	0	0	0	0	0	0	0
Facklamia	0	28	0	0	10	0	20	0	0	0	0	0	0	0	0	0	9	18	0	458	0	73	11	0	216	3	0	0	0	0	1	0	48	0	0	1
Faecalibacterium	0	0	0	0	0	0	0	0	0	0	0	0	0	0	0	0	0	0	0	0	0	8	0	0	3	0	0	0	0	0	0	0	0	0	0	0
Fastidiosipila	17	0	0	0	1	0	0	0	0	0	0	0	0	0	0	0	0	0	0	27	0	0	2	0	2	0	0	0	0	0	0	0	13	0	0	0
Finegoldia	13	141	0	1	5	0	47	0	0	0	1	0	0	0	0	51	148	0	163	1243	0	6	158	2239	688	14	62	0	30	0	809	497	464	125	33	44
Flavobacterium	0	0	0	2	0	6	4	0	0	0	0	0	0	7	0	0	0	0	0	0	0	1	0	0	0	4	5	3	4	0	0	0	0	0	0	0
Francisella	0	13	0	0	0	19	0	0	0	0	0	0	0	0	0	0	0	0	0	0	0	0	0	0	0	0	0	0	0	0	0	0	0	0	0	0
Friedmanniella	0	0	0	0	0	0	0	0	0	0	0	0	0	0	0	0	0	0	0	0	0	0	0	0	0	0	4	0	0	0	0	0	0	0	0	0
Fusobacterium	0	0	0	0	0	0	0	0	0	0	0	0	0	6	0	0	36	0	0	0	0	0	3	0	1	0	0	0	0	1	0	0	0	0	21	0
Gardnerella	1	0	0	361	270	0	0	761	1029	0	0	0	46	0	0	0	0	0	0	0	0	0	0	0	5	21	1	0	0	0	0	0	0	0	1	0
Gemella	0	0	0	0	0	0	0	0	200	0	9	0	0	0	0	0	0	0	0	0	0	2	1	66	5	4	13	0	0	2	17	0	0	0	0	0
Geobacillus	0	0	0	1	0	0	0	0	0	0	0	0	0	0	0	0	0	0	0	0	0	0	0	0	0	0	0	0	0	0	0	0	0	0	0	0
Gordonia	0	0	0	0	0	0	0	0	0	0	0	0	0	0	0	0	0	0	0	0	0	0	0	0	0	0	0	0	6	0	0	2	0	0	0	0
Gp3	0	0	0	0	0	0	0	0	0	0	0	0	0	0	0	0	0	0	0	0	0	0	0	0	0	7	0	0	0	0	0	0	0	0	0	0
Gp6	0	0	0	0	0	0	0	0	0	0	0	0	0	0	0	0	0	0	0	0	0	0	0	0	0	0	5	0	0	0	0	0	0	0	0	0
GpVIII	0	0	0	0	0	0	0	0	0	0	0	0	0	0	0	0	0	0	0	0	0	0	0	0	0	0	0	1	0	0	0	0	0	0	0	0
Granulicatella	0	0	0	0	0	0	0	0	0	0	9	0	0	0	0	0	0	0	0	0	0	0	4	0	0	0	0	0	0	3	7	0	0	0	0	0
Haemophilus	0	46	0	0	0	0	115	110	1	0	6	0	10	0	0	0	0	32	10	0	0	6	1	0	0	6	0	5	42	11	1	1	2	0	0	0
Hallella	0	0	0	0	0	0	0	0	0	0	0	0	0	0	0	0	0	0	0	0	0	0	0	0	0	0	0	0	0	0	0	0	0	0	1	0
Halomonas	0	0	0	0	0	0	0	0	0	0	0	0	0	0	0	0	0	0	0	0	0	0	0	48	0	0	0	0	0	0	0	0	0	0	0	0
Helcococcus	0	0	0	0	4	0	0	0	0	0	0	0	0	0	0	0	179	0	0	111	0	0	4	0	0	0	0	0	0	0	0	0	0	0	209	0
Hespellia	0	0	0	0	0	0	0	0	0	0	0	0	0	0	0	0	0	0	0	0	0	0	0	0	1	0	0	0	0	0	0	0	0	0	0	0
Howardella	0	0	0	0	2	0	0	0	0	0	0	0	0	0	0	0	8	0	0	0	0	0	9	0	0	0	0	0	0	0	0	0	0	0	11	0
Hymenobacter	0	0	0	0	0	0	0	0	0	0	0	0	0	0	0	0	0	1	0	0	0	0	0	0	0	0	0	0	0	0	0	0	0	0	0	0
Janibacter	0	0	0	0	0	0	0	0	0	0	0	0	0	0	0	0	0	0	0	0	0	0	0	0	0	0	0	0	8	0	0	0	0	0	0	0
Janthinobacterium	0	0	0	0	0	0	0	0	0	0	0	0	0	0	0	0	0	0	0	0	0	0	0	0	0	0	0	0	0	0	0	0	1	0	0	0
Jeotgalicoccus	0	0	0	0	2	0	0	0	1	0	0	0	0	0	0	0	0	0	0	0	0	0	2	0	1	0	7	0	0	0	0	0	6	0	0	0
Klebsiella	0	0	0	0	0	0	0	0	0	0	0	0	0	0	0	0	0	0	0	0	0	0	0	0	0	0	0	19	0	21	0	12	0	0	0	17
Kocuria	0	0	0	0	0	0	0	0	0	0	0	0	0	1	0	0	0	0	0	0	0	0	0	0	0	0	0	4	0	0	0	0	0	0	0	0
Lactobacillus	0	1	0	8990	6870	0	0	0	0	0	6	0	2408	0	0	0	0	0	0	0	0	10	7	0	1	6	9	0	0	0	1	0	0	0	0	0
Lactococcus	0	0	0	0	0	0	0	0	0	0	0	0	0	0	0	0	0	0	0	0	0	0	0	0	0	0	0	0	0	0	0	0	9	0	0	0
Leadbetterella	0	0	0	0	0	0	0	0	0	0	0	0	0	0	0	2	0	1	0	0	0	0	0	0	0	0	0	0	0	0	0	0	0	0	0	0
Legionella	0	0	0	0	0	0	0	0	0	0	0	0	0	0	0	0	0	0	1	0	0	6	0	0	0	8	0	0	0	7	0	0	0	0	0	0
Lentzea	0	0	0	0	0	0	0	0	0	0	0	0	0	0	0	0	0	7	0	0	0	0	0	0	0	0	0	0	0	0	0	0	0	0	0	0
Leptotrichia	0	0	0	0	0	0	0	0	0	0	0	0	0	0	0	0	0	0	1	0	0	0	0	0	0	0	0	0	0	0	0	0	0	0	0	0
Leucobacter	0	0	0	0	0	0	0	0	0	0	0	0	0	0	0	0	0	0	0	0	0	0	0	0	0	0	0	0	0	0	0	0	1	0	0	0
Leuconostoc	0	0	0	0	0	0	0	0	0	0	0	0	0	0	0	0	0	0	0	0	0	0	0	0	0	0	0	3	0	0	0	0	0	0	0	0
Luteolibacter	0	0	0	0	0	0	0	0	0	0	0	0	0	0	0	0	2	0	0	0	0	0	0	0	0	4	0	0	0	0	0	0	0	0	0	0
Malikia	0	0	0	0	0	0	0	0	0	0	0	0	0	0	0	0	0	0	0	0	0	0	0	0	0	2	0	0	0	0	0	0	0	0	0	0
Mannheimia	0	0	0	0	0	0	0	1	0	0	0	0	0	0	0	0	0	0	0	0	0	0	1	0	0	0	1	0	0	0	0	0	0	0	0	0
Marinomonas	0	0	0	0	2	0	0	0	0	0	0	0	0	0	0	0	0	0	0	0	0	0	0	0	0	0	0	0	91	0	0	11	0	0	0	0
Marmoricola	0	0	0	0	0	0	0	0	0	0	0	0	0	0	0	10	0	0	0	0	0	0	0	0	0	0	0	0	0	0	0	0	0	0	0	0
Massilia	0	0	0	0	0	1	0	0	0	0	0	0	0	0	0	0	0	0	6	1	0	0	0	0	0	0	0	1	12	1	0	1	0	0	0	0
Megamonas	0	0	0	0	0	0	0	0	0	0	0	0	0	0	0	0	0	0	0	0	0	0	0	0	0	0	0	0	0	0	4	0	0	0	0	0
Methylobacterium	0	276	0	40	2	426	439	1022	40	0	351	2816	70	1657	0	407	19	533	446	16	0	144	3	1538	34	79	754	65	797	273	41	164	96	1508	6	44
Microbacterium	0	0	0	2	0	0	0	0	0	0	0	0	0	0	0	11	0	12	0	0	0	2	0	0	0	0	29	0	17	0	0	4	0	0	0	0
Micrococcus	0	3	0	0	0	0	0	0	5	0	0	0	0	0	0	0	0	0	0	1	0	56	0	0	4	0	18	0	0	4	0	0	8	57	0	0
Microlunatus	0	0	0	0	0	0	0	0	0	0	0	0	0	0	0	0	0	0	2	0	0	0	0	0	0	0	0	0	0	0	0	0	0	0	0	0
Mobiluncus	46	0	0	0	0	0	0	0	0	0	0	1	0	0	0	0	582	0	22	0	0	0	61	0	0	0	0	0	0	0	0	0	15	0	221	0
Mogibacterium	0	0	0	0	0	0	0	0	0	0	0	0	0	0	0	0	0	0	0	0	0	0	2	0	0	0	0	0	0	0	0	0	0	0	0	0
Moraxella	0	0	0	0	0	0	0	0	0	0	0	139	0	0	0	0	0	0	0	0	0	22	0	0	0	0	0	0	0	0	0	0	0	0	0	9
Moryella	0	0	0	0	0	0	0	0	0	0	0	0	0	0	0	0	0	0	0	0	0	0	8	0	0	0	0	0	0	0	0	0	0	0	0	0
Naxibacter	0	0	0	0	0	0	0	0	0	0	0	0	0	0	0	0	0	0	0	0	0	0	0	0	0	0	0	0	0	0	0	0	0	13	0	0
Neisseria	0	0	0	0	0	0	0	0	0	0	0	0	0	0	0	0	0	8	0	0	0	0	0	0	10	0	21	0	0	0	2	0	1	0	0	0
Nosocomiicoccus	0	0	0	0	0	0	0	0	0	0	0	0	0	0	0	0	0	0	0	13	0	18	0	0	7	0	0	0	0	0	0	0	52	0	0	0
OP10_genera_incertae_sedis	0	0	0	0	0	0	0	0	0	0	0	0	0	0	0	0	0	0	0	0	0	1	0	0	0	0	0	0	0	0	0	0	0	0	0	0
OP11_genera_incertae_sedis	0	0	0	0	0	0	0	0	0	0	0	0	0	0	0	0	0	0	0	0	0	0	0	0	0	1	0	0	0	0	0	0	0	0	0	0
Oceanobacillus	0	2	0	0	0	0	0	0	0	0	0	0	0	0	0	0	0	0	0	0	0	0	0	0	0	0	0	0	0	0	0	0	0	0	0	0
Ochrobactrum	0	0	0	0	0	0	0	0	0	0	0	0	0	0	0	0	0	0	0	0	0	3	0	0	0	0	0	0	0	0	0	0	0	0	0	0
Olsenella	0	0	0	0	0	0	0	0	0	0	0	0	0	0	0	0	0	0	0	0	0	0	4	0	0	0	0	0	0	0	0	0	0	0	0	0
Oscillibacter	0	0	0	0	0	0	0	0	0	0	0	0	0	0	0	0	0	0	0	0	0	1	0	0	0	0	0	0	0	0	0	0	0	0	0	0
Paracoccus	0	0	0	0	0	0	0	0	0	0	0	0	0	0	0	0	0	0	0	0	0	7	0	0	0	0	33	0	0	0	0	0	4	0	0	0
Paraprevotella	0	0	0	0	0	0	0	0	0	0	0	0	0	0	0	0	0	0	0	0	0	0	0	0	0	0	0	0	0	0	1	0	0	0	0	0
Parvimonas	129	0	0	0	0	0	0	0	0	0	0	0	0	0	0	0	0	0	135	0	0	0	1	0	0	0	0	0	21	0	1	6	0	0	0	0
Pedobacter	0	0	0	0	0	2	0	0	0	0	0	0	0	0	0	0	0	0	0	0	0	0	0	0	0	0	0	0	0	0	0	0	0	0	0	0
Pelomonas	0	0	0	1	0	0	0	0	0	0	8	0	0	52	0	0	0	5	1	0	0	0	0	0	0	0	0	0	0	1	0	0	0	12	1	3
Peptococcus	0	0	0	0	0	0	0	0	0	0	0	0	0	0	0	0	0	0	0	25	0	0	17	0	0	0	0	0	0	0	0	0	3	0	1	0
Peptoniphilus	740	29	0	1	11	11	0	0	0	0	0	0	0	0	0	7	2024	1	473	851	0	10	993	0	790	7	79	0	3	0	782	45	603	0	1102	133
Peptostreptococcus	0	0	0	0	0	0	30	0	0	0	0	0	0	0	0	0	0	5	0	0	0	4	1	0	0	3	0	0	0	5	2	0	0	0	0	0
Peredibacter	0	0	0	0	0	0	0	0	0	0	0	0	0	0	0	0	1	0	0	0	0	0	0	0	0	0	0	0	0	0	0	0	2	0	0	0
Phocoenobacter	0	0	0	0	0	0	0	0	0	0	0	0	0	0	0	0	0	0	0	0	0	0	0	0	0	0	0	0	0	0	0	0	0	2	0	0
Planomicrobium	0	0	0	0	0	0	0	0	0	0	0	0	0	0	0	0	0	0	0	0	0	0	0	0	0	0	0	0	0	1	0	0	0	0	0	0
Polynucleobacter	0	0	0	3	0	0	0	0	0	0	0	0	0	40	0	0	0	3	0	0	0	0	0	0	0	0	32	0	0	0	0	0	3	0	0	0
Porphyrobacter	0	0	0	0	0	0	0	0	0	0	0	0	0	0	0	0	0	4	0	0	0	0	0	0	0	0	0	0	0	0	0	0	0	0	0	0
Porphyromonas	492	0	0	0	1	0	0	0	0	0	0	0	0	0	0	0	243	0	132	16	0	0	976	0	155	1	0	0	3	0	10	0	102	12	385	11
Prevotella	1402	0	0	0	75	1	0	0	798	0	0	0	0	0	0	4	1492	0	121	29	0	0	867	0	113	0	0	0	0	0	3	0	5	0	1429	0
Propionibacterium	4	52	0	8	3	80	300	605	19	0	122	1300	16	587	0	3525	5	90	77	140	0	52	3	258	13	200	314	17	142	72	8	41	19	673	5	66
Propionimicrobium	471	0	0	0	0	0	0	0	0	0	0	0	0	0	0	0	1631	0	160	0	0	0	11	0	1	0	0	0	0	0	1	0	0	0	777	4
Prosthecobacter	0	0	0	0	0	0	0	0	0	0	5	0	0	0	0	0	0	0	0	0	0	1	0	0	0	0	0	0	0	0	0	0	0	0	0	0
Pseudoalteromonas	0	0	0	0	0	0	0	0	0	0	0	0	0	0	0	0	1	0	7	0	0	0	0	0	0	0	0	0	0	0	0	0	0	0	0	0
Pseudochrobactrum	0	0	0	0	0	0	0	0	0	0	0	0	0	0	0	0	0	0	0	0	0	99	0	0	0	0	0	0	0	0	0	0	0	0	0	0
Pseudomonas	0	0	0	0	0	35	27	56	1	0	8	0	6	0	0	0	1	4	13	0	0	0	0	18	3	0	14	0	0	2	2	0	0	0	0	0
Psychrobacter	0	0	0	0	0	0	0	0	0	0	0	0	0	0	0	0	0	0	0	2	0	0	0	0	0	0	0	0	0	4	0	0	4	0	0	0
Psychromonas	0	0	0	2	1	0	0	0	0	0	0	0	0	0	0	0	0	0	0	0	0	0	0	0	0	0	0	0	21	0	0	8	0	0	0	0
Pyramidobacter	0	0	0	0	0	0	0	0	0	0	0	0	0	0	0	0	0	0	0	0	0	0	3	0	62	0	0	0	0	0	0	0	0	0	0	0
Ralstonia	0	0	0	0	0	0	0	0	0	0	0	0	1	0	0	0	0	13	0	0	0	0	0	85	0	0	0	1	0	0	0	0	0	0	0	0
Rheinheimera	0	0	0	0	0	0	0	0	0	0	0	0	0	0	0	0	0	0	0	0	0	0	0	0	0	2	0	0	0	0	0	0	0	0	0	0
Rhizobium	0	0	0	0	0	0	0	0	0	0	0	0	0	0	0	0	0	0	0	0	0	1	0	0	0	0	0	0	0	0	0	0	0	0	0	0
Rhodobacter	0	0	0	0	0	0	0	0	0	0	0	0	0	0	0	0	0	0	0	0	0	0	0	0	0	0	0	0	0	0	0	0	0	0	1	0
Rhodococcus	0	0	0	0	0	0	0	0	0	0	0	0	0	0	0	0	0	0	0	0	0	0	0	0	0	0	0	0	0	0	0	2	0	5	0	0
Rhodopseudomonas	0	0	0	0	0	0	0	0	0	0	0	0	0	0	0	0	0	0	0	0	0	0	0	0	0	0	0	2	0	0	0	0	0	0	0	0
Roseateles	0	0	0	0	0	13	0	0	0	0	0	0	0	0	0	0	0	0	0	0	0	0	0	0	0	0	0	0	0	0	0	0	0	0	0	0
Roseomonas	0	0	0	0	0	0	0	0	0	0	0	0	0	0	0	0	0	8	0	0	0	0	0	0	0	0	0	0	0	0	0	0	0	173	0	0
Rothia	0	4	0	0	2	29	0	0	7	0	13	0	0	0	0	0	0	0	0	2	0	0	2	0	6	0	0	0	53	0	16	11	0	0	0	0
Rubellimicrobium	0	0	0	0	0	0	0	0	0	0	0	0	0	0	0	11	0	0	0	1	0	0	0	0	0	0	0	0	0	0	0	0	0	0	0	0
Ruminococcus	0	0	0	0	0	0	0	0	0	0	0	0	0	0	0	0	0	0	0	0	0	0	0	0	2	0	0	0	0	0	0	0	0	0	0	0
Salinibacterium	0	0	0	0	0	0	0	0	0	0	0	0	0	0	0	0	0	0	0	0	0	0	0	0	0	0	0	0	2	0	0	0	0	0	0	0
Salinicoccus	0	0	0	0	0	0	0	0	0	0	0	0	0	0	0	0	0	0	0	0	0	1	0	0	0	0	0	0	0	0	0	0	0	0	0	0
Sanguibacter	0	0	0	0	0	0	0	0	0	0	0	0	0	0	0	5	0	0	0	0	0	0	0	0	0	0	0	0	0	0	0	0	0	0	0	0
Sediminibacterium	0	0	0	0	0	0	4	0	0	0	0	0	0	22	0	0	0	0	0	0	0	0	0	0	0	0	0	0	0	0	0	0	0	0	0	0
Selenomonas	0	0	0	0	0	0	0	0	0	0	0	0	0	0	0	0	0	0	0	0	0	0	0	0	0	0	0	0	0	0	4	0	0	0	0	0
Serratia	0	5	0	0	0	0	30	0	0	0	0	0	0	0	0	0	0	0	0	0	0	0	0	0	0	0	0	0	0	0	0	0	0	0	0	0
Shewanella	0	0	0	0	0	31	53	0	5	0	0	0	2	0	0	0	0	20	0	0	0	0	0	0	0	0	0	0	0	0	0	0	0	0	0	0
Shinella	0	0	0	0	0	0	0	0	0	0	0	0	0	0	0	0	0	0	0	0	0	0	0	48	0	0	0	0	0	0	0	0	0	0	0	0
Simplicispira	0	0	0	0	0	0	0	0	0	0	0	0	0	0	0	0	0	0	0	0	0	0	0	0	0	0	0	0	1	0	0	0	0	0	0	0
Slackia	0	0	0	0	0	0	0	0	1	0	0	0	0	0	0	0	0	0	0	0	0	0	1	0	0	0	0	0	0	0	0	0	0	0	0	0
Sneathia	0	0	0	0	63	0	0	0	1129	0	0	0	0	0	0	0	0	0	0	0	0	0	0	0	1	0	0	0	0	0	0	0	0	0	0	0
Spartobacteria_genera_incertae_sedis	0	0	0	0	0	0	0	0	0	0	0	0	0	0	0	0	0	0	0	0	0	1	0	0	0	0	0	0	0	0	0	0	0	0	0	0
Sphingobacterium	0	0	0	0	0	0	0	0	0	0	0	0	1	0	0	0	0	0	0	0	0	0	0	0	0	0	0	0	0	0	0	0	0	0	0	0
Sphingomonas	0	21	0	0	0	0	0	0	0	0	0	38	0	0	0	9	0	0	1	0	0	3	0	0	0	0	3	0	6	0	0	1	0	57	0	0
Sporolactobacillus	0	0	0	0	0	0	0	0	0	0	0	0	0	0	0	0	0	0	1	0	0	0	0	0	0	0	0	0	0	0	0	0	0	0	0	0
Sporosarcina	0	0	0	0	0	0	0	0	0	0	0	108	0	0	0	0	0	0	0	0	0	0	0	0	0	0	0	0	0	0	0	0	0	0	0	0
Staphylococcus	1	287	0	246	24	19	291	0	223	0	173	524	8	245	0	2042	10	5963	61	1367	0	236	12	229	2319	1965	987	81	2378	2108	1238	1947	88	472	0	360
Stenotrophomonas	0	0	0	0	0	3	0	0	0	0	0	0	0	0	0	0	0	0	0	0	0	0	0	0	0	0	0	0	0	0	0	0	0	0	0	0
Streptococcus	136	5248	0	2	242	3637	225	52	3	0	6771	0	1	0	0	32	816	3	70	1	0	0	93	71	22	31	40	0	80	22	61	17	4	28	33	0
Streptophyta	2	31	0	4	1	31	0	39	2	0	8	0	2	0	0	1508	3	12	2899	1	0	12	1	1188	4	23	64	9	474	15	10	82	7	165	2	5
Subdivision3_genera_incertae_sedis	0	0	0	0	0	0	0	0	0	0	0	0	0	39	0	0	0	0	0	0	0	1	0	0	0	0	0	0	0	0	0	0	0	0	0	0
Sutterella	0	0	0	0	0	0	0	0	0	0	0	0	0	0	0	0	0	0	0	0	0	0	7	0	0	0	0	0	0	0	0	0	0	0	0	0
TM7_genera_incertae_sedis	0	0	0	0	0	0	0	0	5	0	0	0	0	0	0	0	0	3	4	0	0	0	0	0	0	0	0	0	0	0	0	2	1	38	0	0
Tetrasphaera	0	0	0	0	0	0	0	0	0	0	0	0	0	0	0	0	0	0	0	0	0	3	0	0	0	0	0	0	0	0	0	0	1	0	0	0
Thermoactinomyces	0	0	0	0	0	0	0	0	0	0	0	0	0	0	0	0	0	0	0	0	0	2	0	0	0	0	0	0	0	0	0	0	0	0	0	0
Turicella	0	0	0	0	0	0	0	0	0	0	0	0	0	0	0	0	0	0	0	0	0	0	0	0	3	0	0	0	0	0	0	0	0	0	0	0
Ureaplasma	0	0	0	0	0	0	0	0	2	0	0	0	0	0	0	0	0	0	0	0	0	0	0	0	0	0	0	0	0	0	0	0	0	0	0	0
Varibaculum	516	0	0	0	0	0	0	0	0	0	0	0	0	0	0	0	250	0	129	0	0	0	22	0	5	0	0	0	0	0	0	0	12	0	29	2
Variovorax	0	4	0	0	0	0	2	0	0	0	0	0	0	0	0	0	0	10	0	0	0	0	0	0	0	0	0	0	1	0	0	1	0	0	0	0
Veillonella	0	0	0	0	544	0	0	0	1830	0	0	0	728	0	0	24	0	28	0	4	0	0	37	0	2	0	0	0	0	0	38	0	0	0	1	0
Vibrio	0	0	0	0	0	0	0	0	0	0	0	0	0	0	0	0	0	0	10	0	0	0	0	0	0	0	0	0	0	0	0	0	0	0	0	0
Weissella	0	0	0	0	0	0	0	0	0	0	0	0	0	0	0	0	0	0	0	0	0	0	0	0	0	0	0	0	12	0	0	1	0	0	0	0
Williamsia	0	0	0	0	0	0	0	0	0	0	0	0	0	0	0	0	0	0	0	0	0	1	0	0	0	0	0	0	1	0	0	2	0	0	0	0
Yaniella	0	0	0	0	0	0	0	0	0	0	0	0	0	0	0	0	0	0	0	1	0	0	0	0	0	0	0	0	0	0	0	0	0	0	0	0
Yersinia	0	0	0	1	0	0	0	0	0	0	0	0	0	0	0	0	0	0	0	0	0	0	0	0	0	0	0	0	0	0	0	0	0	0	0	0
Zimmermannella	0	0	0	0	1	0	0	0	1	0	0	0	0	0	0	0	0	0	0	0	0	0	2	0	0	5	0	26	0	0	1	1	1	13	0	0
Zoogloea	0	0	0	0	0	0	0	0	0	0	0	0	0	0	0	0	0	0	0	0	0	0	0	0	0	2	0	0	0	0	0	0	0	21	0	0
